# Supplementary material for: Cladribine and ocrelizumab induce differential miRNA profiles in peripheral blood mononucleated cells from relapsing–remitting multiple sclerosis patients
Source: PubMed Central journal article supplement (PMC10751352; doi:10.3389/fimmu.2023.1234869), 2023-12-13

# Supplementary Figure S1

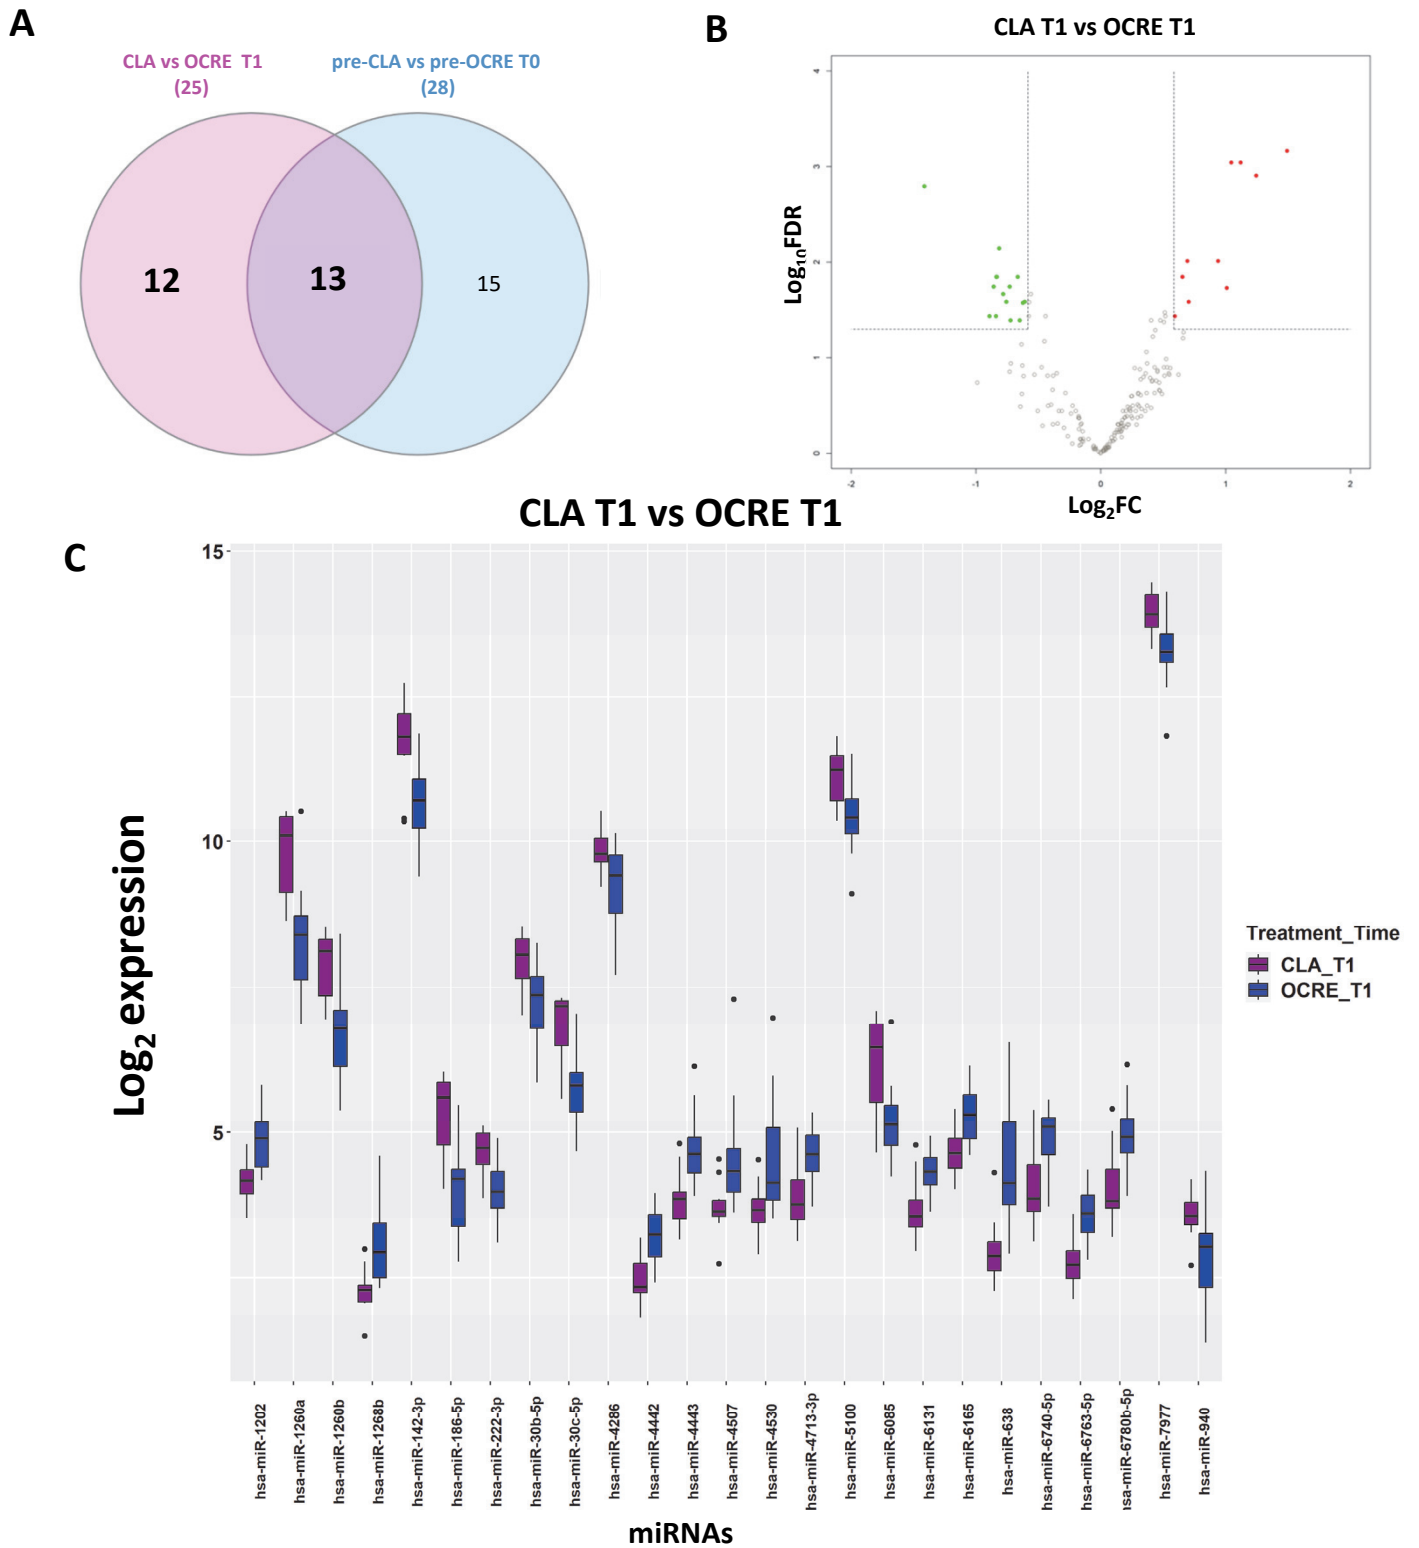

# Supplementary Figure S2

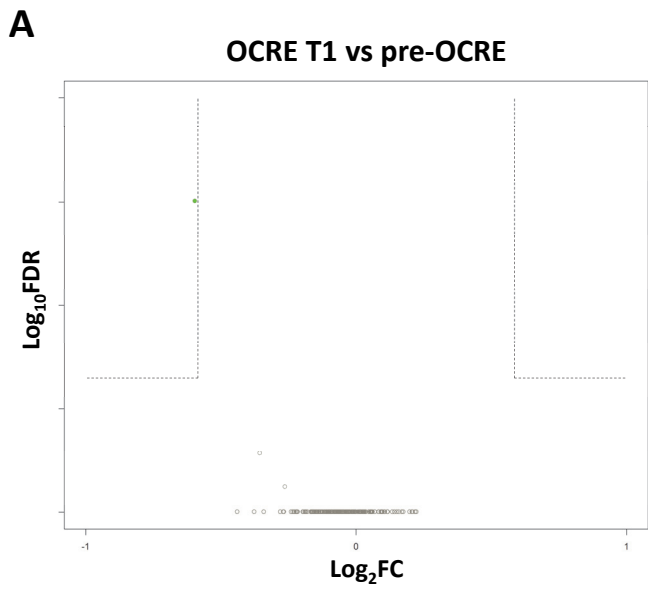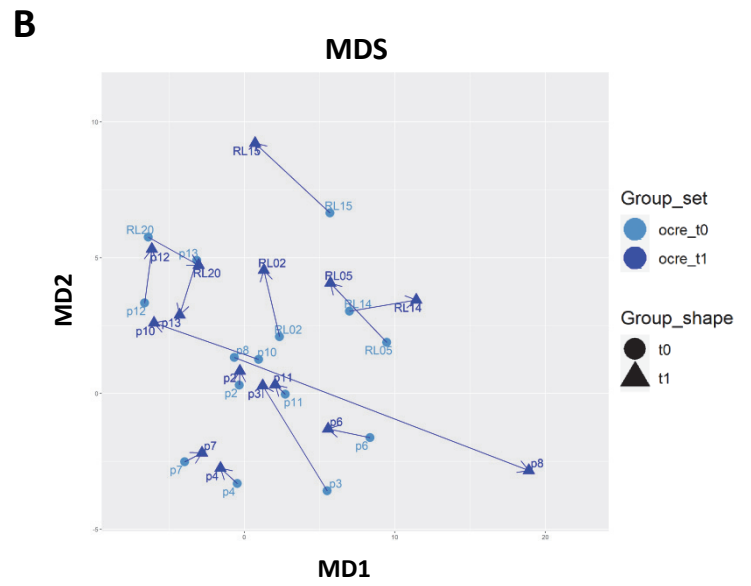

# Supplementary Figure S3

|             | log <sub>2</sub> FC<br>(PRE-CLA<br>VS PRE-<br>OCRE) | PRE-CLA             |         |       |         |       | PRE-OCRE                     |                     |       |       |
|-------------|-----------------------------------------------------|---------------------|---------|-------|---------|-------|------------------------------|---------------------|-------|-------|
|             |                                                     | Urinary<br>symptoms | EDSS T0 | FI T0 | EDSS T1 | FI T1 | Disease<br>Duration<br>at T0 | Urinary<br>symptoms | FI T0 | FI T1 |
| miR-1260a   | 1.52                                                | -                   | -       | 0.77  | -       | 0.81  | -                            | -0.71               | -     | -     |
| miR-186-5p  | 1.27                                                | -                   | -       | 0.82  | -       | 0.83  | -                            | -                   | -     | -     |
| miR-1260b   | 1.23                                                | -                   | -       | 0.76  | -       | 0.79  | -                            | -0.71               | -     | -     |
| miR-6085    | 1.17                                                | -                   | -       | 0.72  | -       | 0.77  | -                            | -0.81               | -     | -     |
| miR-142-3p  | 0.99                                                | -                   | -       | 0.80  | -       | 0.77  | -0.53                        | -                   | -     | -     |
| miR-29b-3p  | 0.97                                                | -                   | -       | -     | -       | -     | -0.66                        | -                   | -     | -     |
| miR-29c-3p  | 0.94                                                | -                   | -       | -     | -       | -     | -0.60                        | -                   | -     | -     |
| miR-155-5p  | 0.90                                                | 0.67                | -       | 0.77  | -       | 0.81  | -                            | -                   | -0.59 | -0.58 |
| miR-874-3p  | 0.89                                                | -                   | -       | 0.64  | -       | 0.67  | -                            | -                   | -     | -     |
| miR-30c-5p  | 0.81                                                | -                   | -       | 0.81  | -       | 0.82  | -                            | -0.77               | -     | -     |
| miR-5100    | 0.79                                                | -                   | 0.64    | 0.76  | -       | 0.79  | -                            | -0.69               | -     | -     |
| miR-146b-5p | 0.79                                                | -                   | -       | 0.92  | -       | 0.89  | -                            | -                   | -     | -     |
| miR-7977    | 0.70                                                | -                   | -       | -     | -       | -     | -                            | -0.73               | -     | -     |
| miR-664b-3p | 0.68                                                | -                   | -       | 0.75  | 0.65    | 0.76  | -                            | -                   | -     | -     |
| miR-30b-5p  | 0.63                                                | -                   | -       | 0.75  | -       | 0.72  | -                            | -                   | -     | -     |
| miR-199a-3p | -0.64                                               | -                   | -       | -     | -       | -     | -                            | -                   | 0.59  | 0.56  |

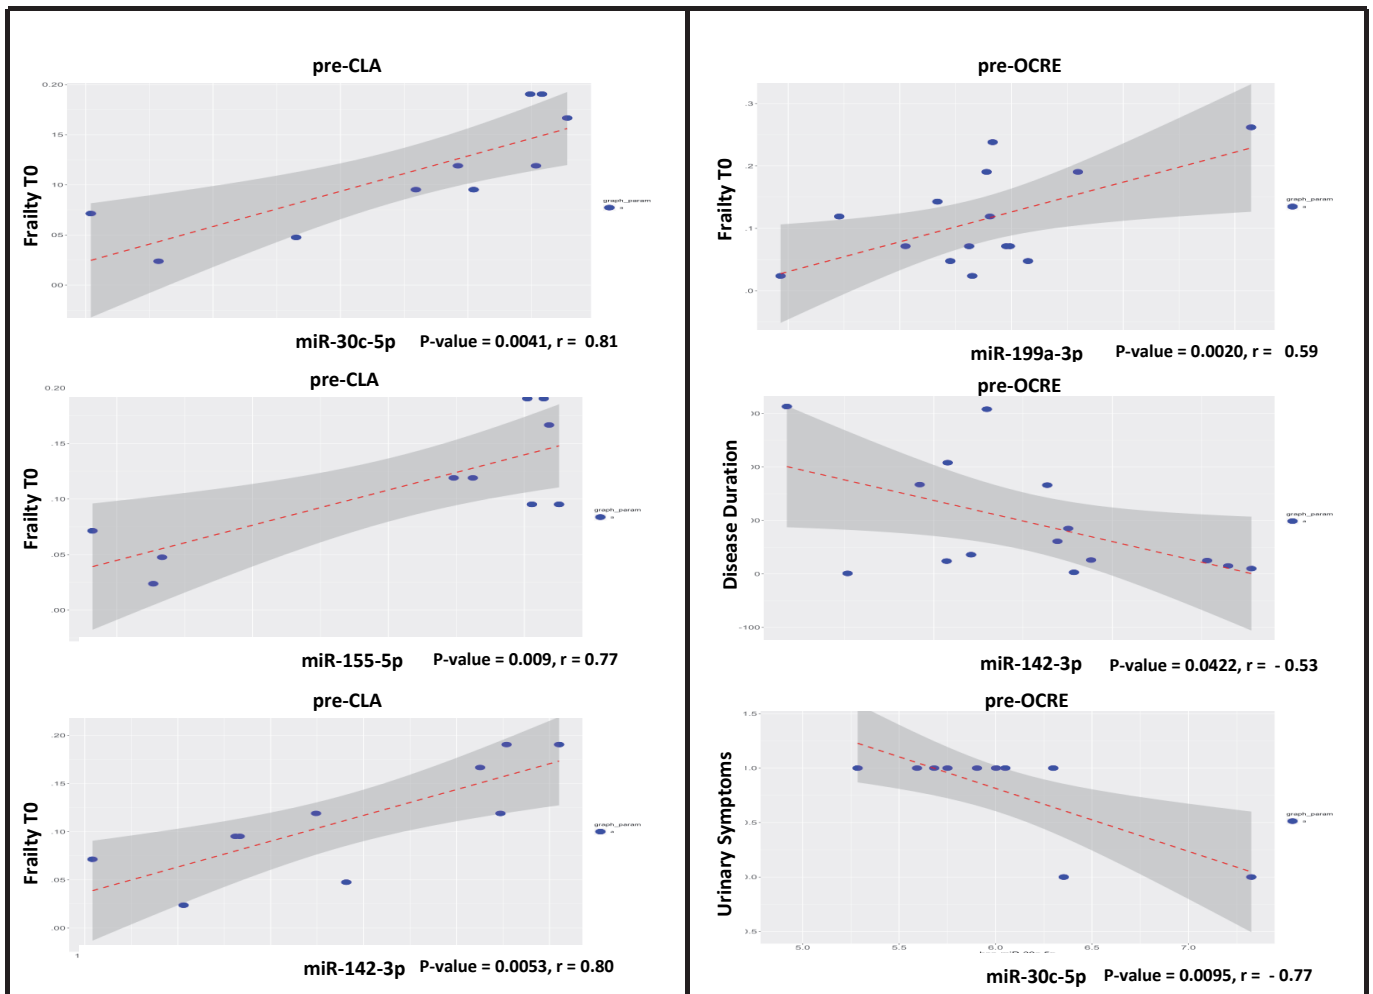

# Supplementary Figure S4

|              | Log2FC<br>(CLA T1 vs OCRE T1) | CLA T1              |       |       | OCRE T1             |       |       |
|--------------|-------------------------------|---------------------|-------|-------|---------------------|-------|-------|
|              |                               | Urinary<br>Symptoms | FI T0 | FI T1 | Urinary<br>Symptoms | FI T0 | FI T1 |
| miR-1202     | -0.68                         | -                   | -     | -     | -                   | -     | -     |
| miR-1268b    | -0.79                         | -                   | -     | -     | -                   | -     | -     |
| miR-4442     | -0.76                         | -                   | -     | -     | -                   | -     | -     |
| miR-4443     | -0.85                         | -                   | -     | -     | -                   | -     | -     |
| miR-4507     | -0.86                         | -                   | -     | -     | -                   | -     | -     |
| miR-4530     | -0.90                         | -                   | -     | -     | -                   | -     | -     |
| miR-4713-3p  | -0.71                         | -                   | -0.63 | -0.64 | 0.69                | -     | -     |
| miR-6131     | -0.61                         | -                   | -     | -     | 0.74                | -     | -     |
| miR-6165     | -0.63                         | -                   | -     | -     | -                   | -     | -     |
| miR-6740-5p  | -0.81                         | -                   | -     | -     | -                   | -     | -     |
| miR-6763-5p  | -0.83                         | -                   | -     | -     | -                   | -     | -     |
| miR-6780b-5p | -0.83                         | -                   | -     | -0.64 | -                   | -     | -     |

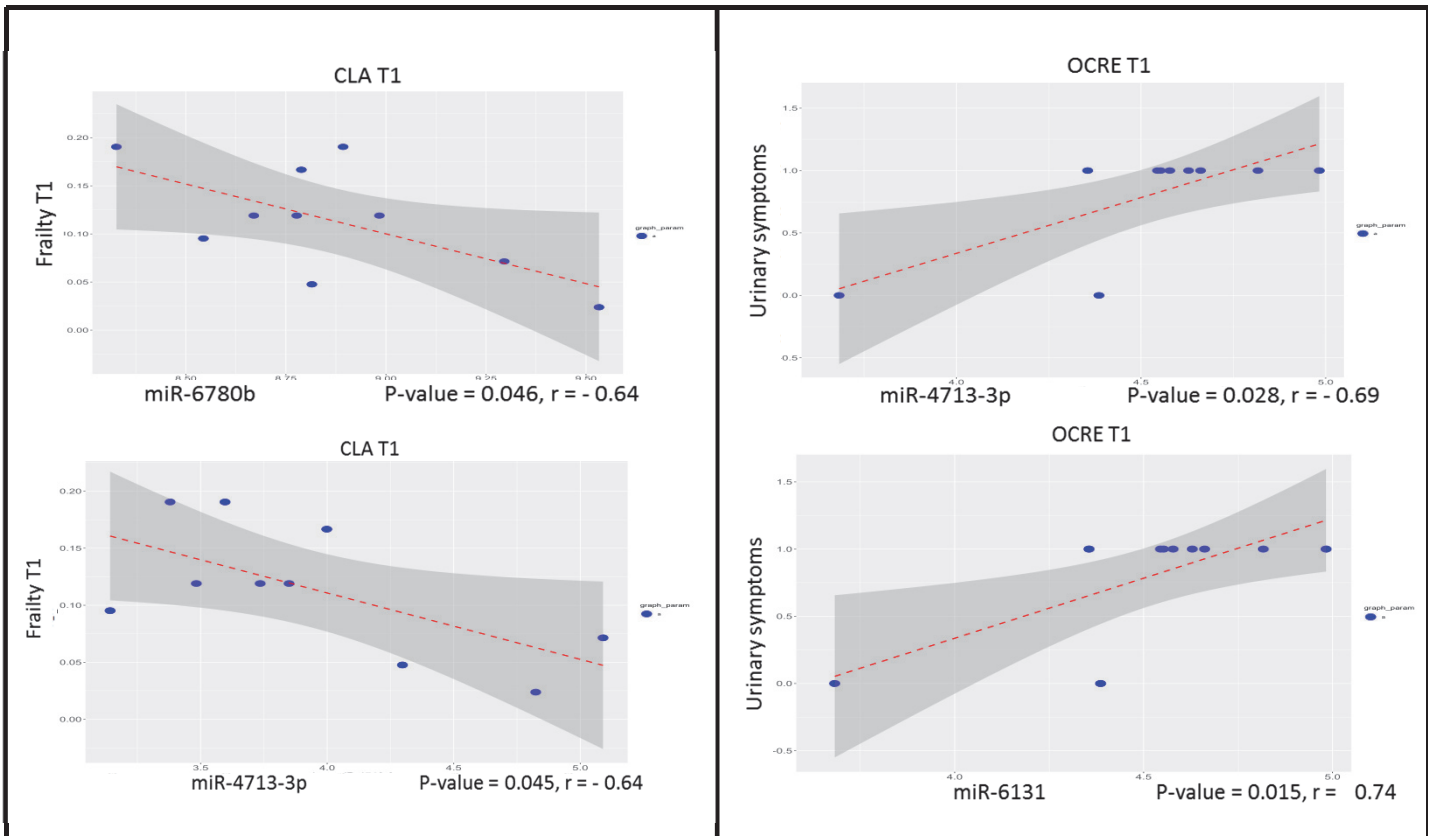

# Supplementary Figure S5

|             | log <sub>2</sub> FC<br>(CLA T1 VS<br>PRE-CLA) | CLA T0              |       | CLA T1                       |                     |       |       |
|-------------|-----------------------------------------------|---------------------|-------|------------------------------|---------------------|-------|-------|
|             |                                               | Urinary<br>symptoms | FI T1 | Disease<br>Duration<br>at T0 | Urinary<br>symptoms | FI T0 | FI T1 |
| miR-584-5p  | 0.86                                          | 0.66                | -     | -                            | -                   | -     | -     |
| miR-199a-3p | 0.75                                          | -                   | -     | -                            | -0.71               | -     | -     |
| miR-151a-3p | 0.74                                          | -                   | -     | -                            | -0.75               | -0.67 | -0.68 |
| miR-326     | 0.73                                          | -                   | -     | 0.74                         | -                   | -     | -     |
| miR-221-3p  | 0.70                                          | 0.68                | -     | 0.83                         | -                   | -     | -     |
| miR-151a-5p | 0.67                                          | 0.71                | -     | -                            | -0.75               | -     | -     |
| miR-23b-3p  | 0.66                                          | 0.74                | -     | 0.88                         | -                   | -     | -     |
| miR-148b-3p | 0.62                                          | 0.75                | -     | -                            | -                   | -     | -     |
| miR-27b-3p  | 0.61                                          | -                   | -     | 0.76                         | -                   | -     | -     |
| miR-342-5p  | -0.59                                         | -                   | -     | -0.80                        | -                   | -     | -     |
| miR-8069    | -0.60                                         | -                   | -     | -                            | 0.81                | -     | -     |
| miR-4443    | -0.61                                         | -0.79               | -     | -                            | -                   | -     | -     |
| miR-4507    | -0.62                                         | -0.83               | -     | -                            | -                   | -     | -     |
| miR-150-5p  | -0.63                                         | -                   | -     | -0.74                        | -                   | -     | -     |
| miR-29c-3p  | -0.63                                         | -                   | -     | -                            | 0.88                | -     | -     |
| miR-4505    | -0.64                                         | -0.72               | -     | -                            | -                   | -     | -     |
| miR-197-3p  | -0.67                                         | -                   | 0.66  | -                            | -                   | -     | -     |

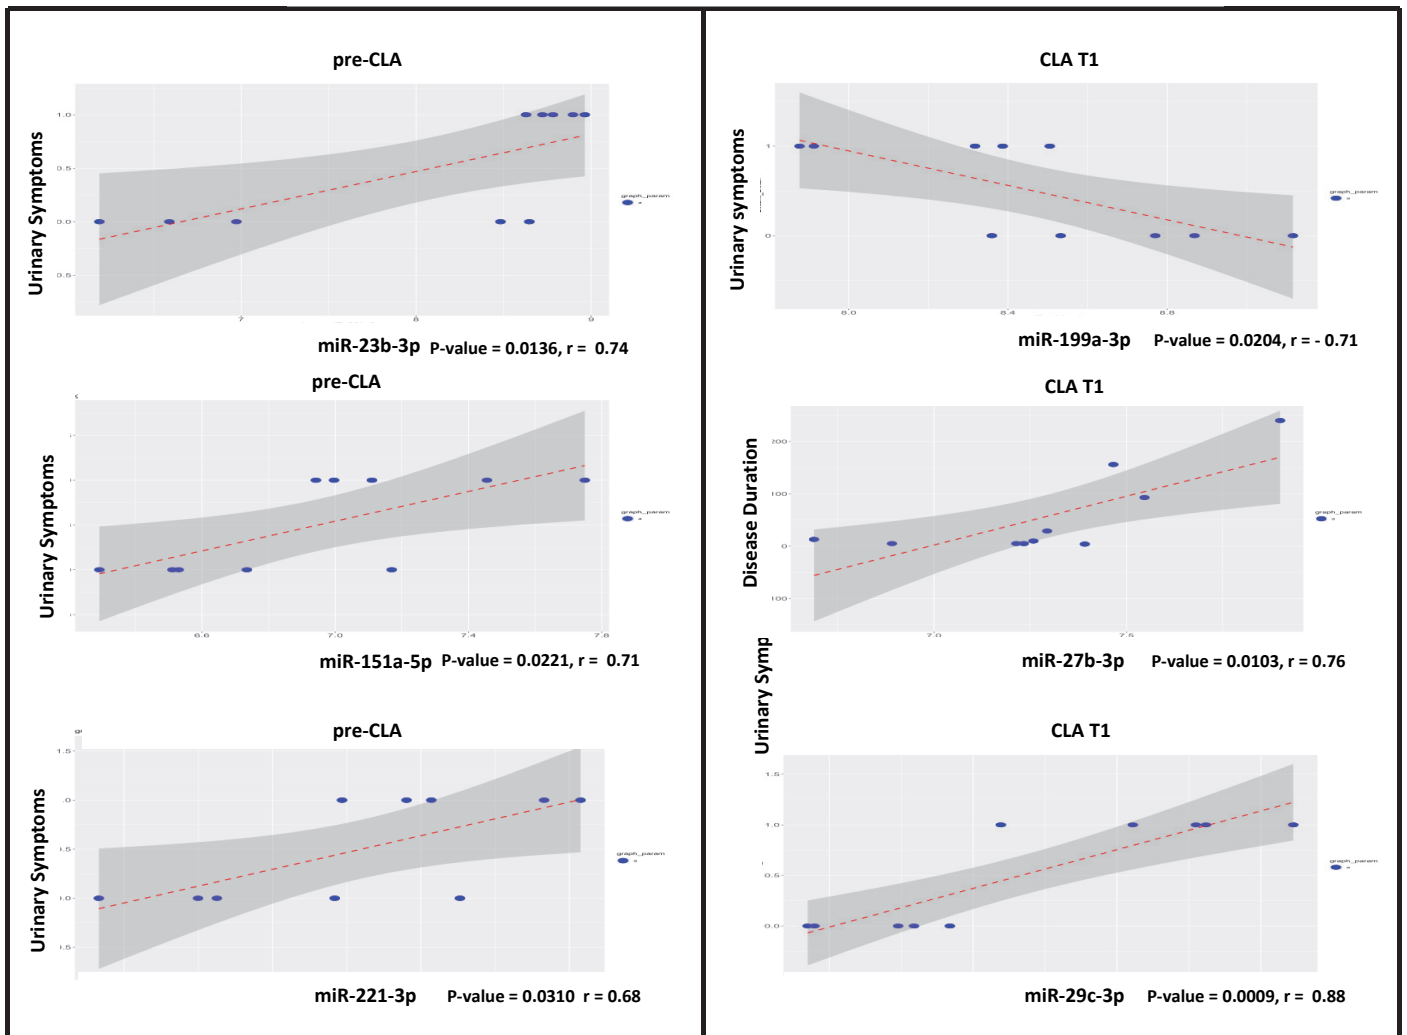



Supplementary Figure S7

**Differentially expressed miRNAs:  
FDR<0.05 + |FC|>1.50**

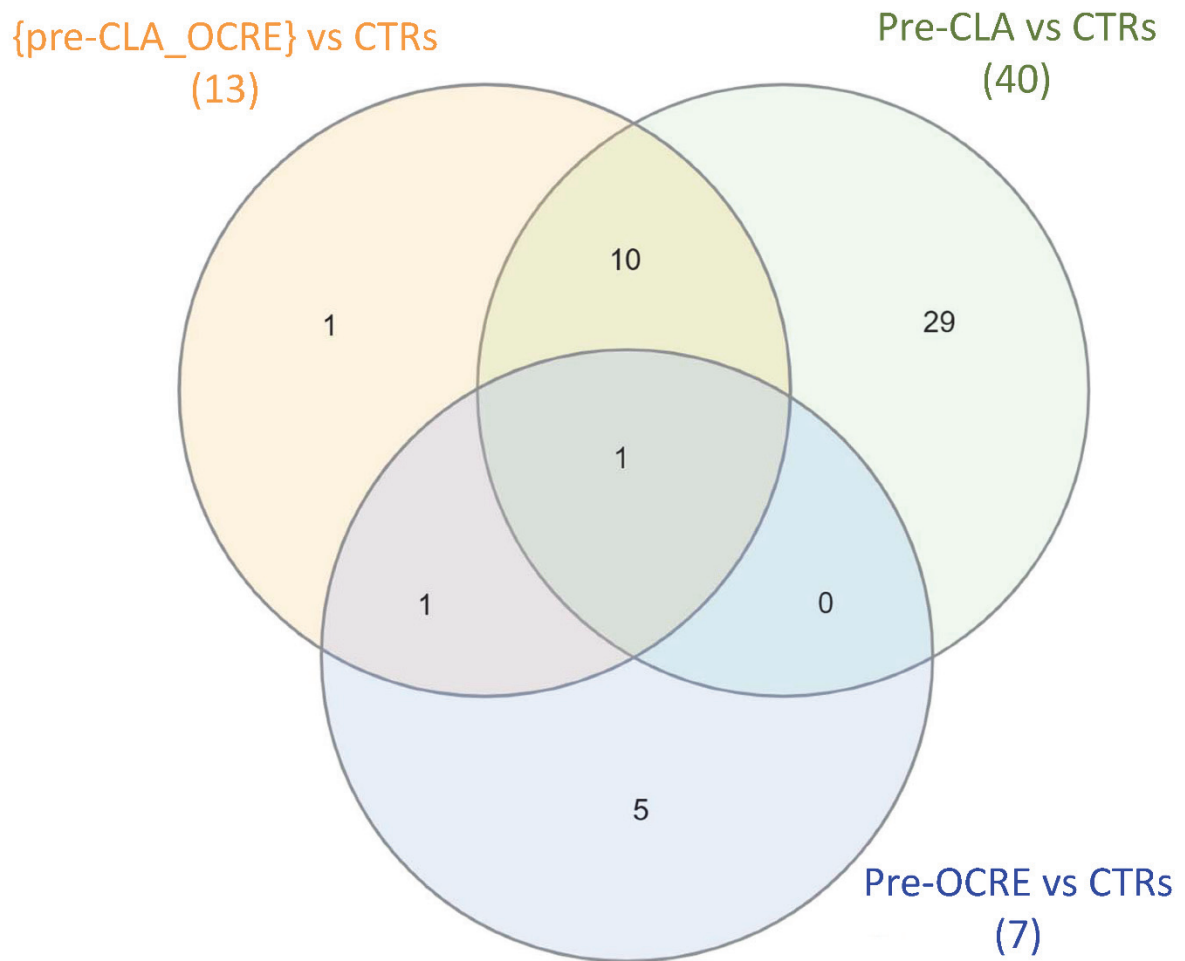

# Supplementary Figure S8

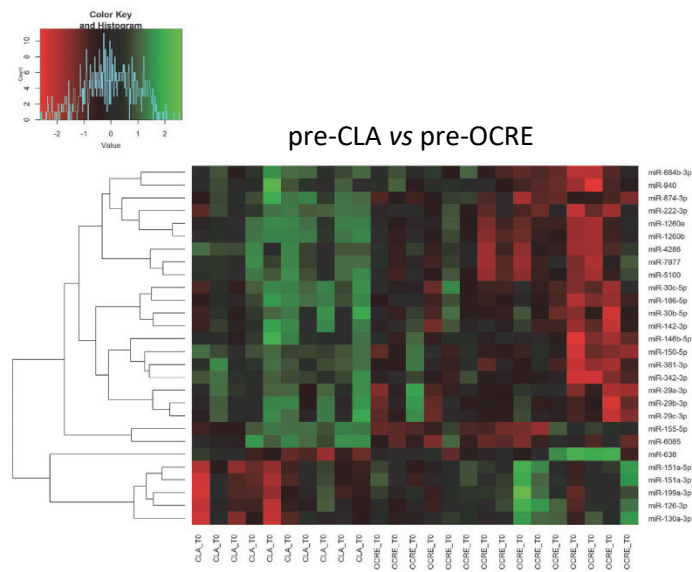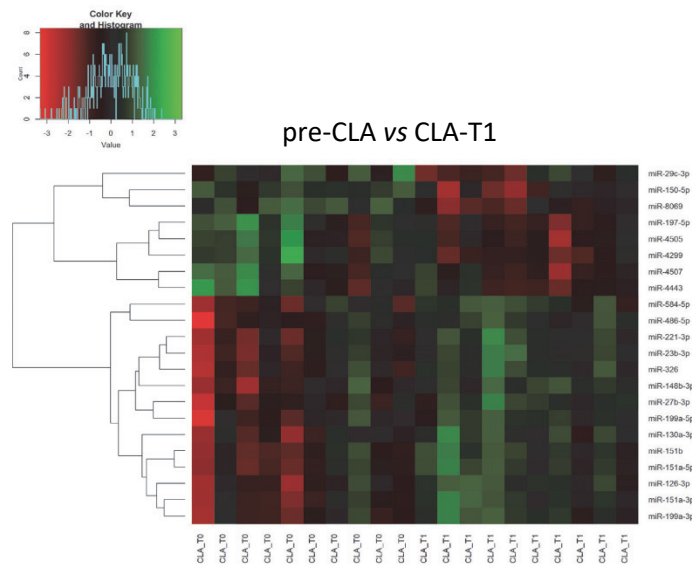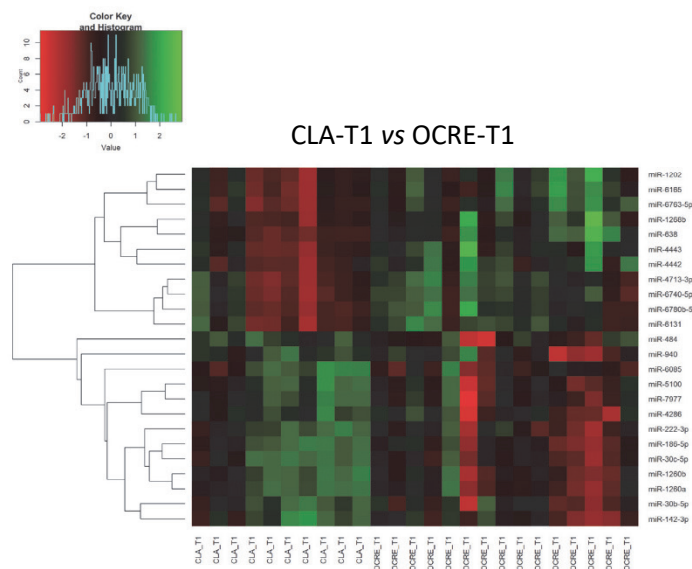

Supplement: DataSheet_1.pdf [file DataSheet_1.pdf]
