# Supplementary material for: Cladribine and ocrelizumab induce differential miRNA profiles in peripheral blood mononucleated cells from relapsing–remitting multiple sclerosis patients
Source: PubMed Central journal article supplement (PMC10751352; doi:10.3389/fimmu.2023.1234869), 2023-12-13

## *Supplementary Material*

**Cladribine and Ocrelizumab induce differential miRNA profiles in peripheral blood mononuclear cells from relapsing-remitting Multiple Sclerosis patients.**

**Ivan Arisi<sup>1,2\*</sup>, Leonardo Malimpensa<sup>3\*</sup>, Valeria Manzini<sup>1</sup>, Rossella Brandi<sup>1</sup>, Tommaso Gosetti di Sturmeck<sup>1</sup>, Chiara D'Amelio<sup>1</sup>, Sebastiano Crisafulli<sup>4</sup>, Gina Ferrazzano<sup>5</sup>, Daniele Belvisi<sup>3,5</sup>, Francesca Malerba<sup>1</sup>, Rita Florio<sup>1</sup>, Esterina Pascale<sup>6</sup>, Hermona Soreq<sup>7</sup>, Marco Salvetti<sup>3,8</sup>, Antonino Cattaneo<sup>1,9</sup>, Mara D'Onofrio<sup>1†</sup>, Antonella Conte<sup>3,5†</sup>**

<sup>1</sup> European Brain Research Institute (EBRI) Rita Levi-Montalcini, Rome, Italy,

<sup>2</sup> Institute of Translational Pharmacology, National Research Council, Rome, Italy,

<sup>3</sup> IRCCS Istituto Neurologico Mediterraneo Neuromed, Pozzilli (IS), Italy,

<sup>4</sup> Fondazione IRCCS Istituto Neurologico Carlo Besta, Milan, Italy,

<sup>5</sup> Department of Human Neurosciences, Sapienza University of Rome, Rome, Italy,

<sup>6</sup> Department of Medical-Surgical Sciences and of Biotechnologies, "Sapienza" University of Rome, Rome, Italy

<sup>7</sup> The Edmond and Lily Safra Center of Brain Science and The Life Sciences Institute, The Hebrew University of Jerusalem, Jerusalem, Israel,

<sup>8</sup> Centre for Experimental Neurological Therapies (CENTERS), Department of Neurosciences, Mental Health and Sensory Organs, Sapienza University of Rome, Italy,

<sup>9</sup> Bio@SNS Laboratory of Biology, Scuola Normale Superiore, Pisa, Italy.

\* Frist authorship

† Senior authorship

**\* Correspondence:**

Prof. Antonella Conte

Department of Human Neurosciences, "Sapienza" University

P. le A. Moro 5

Rome, Italy, 00185

[antonella.conte@uniroma1.it](mailto:antonella.conte@uniroma1.it)

**Supplementary Table S1: miRNA profiles on PBMC of RRMS patients before either CLA or OCRE treatment (T0 in pre-CLA vs pre-OCRE) compared to known literature.**

**Supplementary Table S2: miRNA profiles on PBMCs post-treatment, T1 (CLA T1 vs OCRE T1) compared to known literature.**

**Supplementary Figure S1. miRNA profile levels on PBMC in post-treatment groups (T1).**

**1A)** Venn Diagram for the DE miRNAs in pretreatments and post treatments groups, for CLA and OCRE. **1B)** Volcano plot of the CLA T1 vs OCRE T1 miRNAs comparison. DE miRNAs (down-regulated in green and up-regulated in red) were selected by the R limma tool with thresholds  $FDR < 0.05$  and linear  $FoldChange > 1.5$ . **1C)** DE miRNAs in CLA T1 vs OCRE T1 comparison. Log<sub>2</sub> median normalized expression values of DE miRNAs are shown; miRNAs were selected using the following thresholds: R limma test  $FDR < 0.05$  + linear  $FoldChange > 1.5$ . Boxes correspond to median  $\pm$  IQR, black dots are outliers.

**Supplementary Figure S2: OCRE-T1 vs pre-OCRE effect on miRNA DE profiles. 2A)** Volcano plot of the OCRE T1 vs pre-OCRE microRNAs comparison. **2B)** Multidimensional Scaling of CLA samples based on the miRNA transcriptome. Each arrow corresponds to a different patient treated with OCRE and connects the miRNAs profile at T0 (light blue dot) to the profile at T1 (dark blue dot).

**Supplementary Table S3: Effects of CLA treatment on PBMCs miRNA profiles at T1. Data comparison to known literature.**

**Supplementary Table S4: miRNA profile values in different group comparison.** Different comparisons between groups present DE miRNAs which are significantly overexpressed (red), downregulated (green) or non-significantly deregulated (black). Log<sub>2</sub> median normalized expression values of DE miRNAs are shown; miRNAs were selected using the following thresholds: R limma test  $FDR < 0.05$  + linear  $FoldChange > 1.5$ .

**Supplementary Table S5: Statistical comparisons between CLA and OCRE treated patients for demographics and clinical data.** Either two-sided Mann-Witney or Fisher's exact test p-values are shown where appropriate.

**Supplementary Table S6: Pearson's correlation between miRNAs expression values and lymphocytes counts.** Pre-CLA and pre-OCRE groups are correlated to counts at T0, while CLA T1 and OCRE T1 groups are correlated to counts at T1.

**Statistical comparisons between CLA and OCRE treated patients for demographics and clinical data.** Either two-sided Mann-Witney or Fisher's exact test p-values are shown where appropriate.

**Supplementary Figure S3: Correlation between miRNA profiles and clinical data in pre-treatment groups. 3A)** The Pearson correlation index between DE miRNA (selected by the pre-CLA vs pre-OCRE contrast) and specific clinical variables is shown in case of statistical significance. T1 = 6 months after treatment start. Analyzed clinical variables: presence of urinary symptoms (yes/no, binary); EDSS score (integer discrete); Frailty Index score; Disease duration in months. Table of

significant correlations. **3B)** Scatter plot expression value vs clinical variable for selected correlations with miRNAs in the different pre-CLA and pre-OCRE groups; the regression line is drawn.

**Supplementary Figure S4: Correlation between miRNA profiles and clinical data in post-treatment groups. 4A)** The Pearson correlation index between DE miRNA (CLA T1 vs OCRE T1) and selected clinical variables is shown in case of statistical significance. T1 = 6 months after treatment starts. Analyzed clinical variables: presence of urinary symptoms (yes/no, binary); EDSS score (integer discrete); Frailty Index score; Disease duration in months. Table of significant correlations. **4B)** Scatter plot expression value vs clinical variable for selected correlations with miRNAs in the OCRE T1 and CLA T1 groups; the regression line is drawn. Scatter plot expression value vs clinical variable for selected correlations with miRNA in both groups; the regression line is drawn

**Supplementary Figure S5: Correlation between miRNA profiles and clinical data in pre and post CLA treatment. 5A)** The Pearson correlation index between DE miRNA (pre- CLA vs CLA T1) and selected clinical variables is shown in case of statistical significance. T1 = 6 months after treatment start. Analyzed clinical variables: presence of urinary symptoms (yes/no, binary); EDSS score (integer discrete); Frailty Index score; Disease duration in months. Table of significant correlations. **5B)** Scatter plot expression value vs clinical variable for selected correlations with miRNA in the pre-CLA and CLA T1 groups; the regression line is drawn.

**Supplementary Figure S6: Boxplots non-normalized and median normalized of Log2 transformed data samples.**

**Supplementary Figure S7: Venn diagram with numbers of DEGs, vs controls, for pooled pre-CLA and pre-OCRE groups, compared to pre-CLA and pre-OCRE groups separately analysed.** DE miRNAs were selected by the R limma tool with thresholds  $FDR < 0.05$  and linear  $FoldChange > 1.5$ .

**Supplementary Figure S8: Heat maps of DEGs in different comparisons.** The normalised expression value for each miRNA is mean-centered.

Supplementary Table S1.

| <b>miRNA profiles on PBMC of RRMS patients before either CLA or OCRE treatment (T0 in pre-CLA vs pre-OCRE) compared to known literature</b> |                          |                                                                                                                                                                                                                                       |
|---------------------------------------------------------------------------------------------------------------------------------------------|--------------------------|---------------------------------------------------------------------------------------------------------------------------------------------------------------------------------------------------------------------------------------|
| <b>miRNAs</b>                                                                                                                               | <b>Log<sub>2</sub>FC</b> | <b>Previous studies on MS and other neurodegenerative diseases</b>                                                                                                                                                                    |
| <b>miR-1260a</b>                                                                                                                            | <b>1.60</b>              |                                                                                                                                                                                                                                       |
| <b>miR-186-5p</b>                                                                                                                           | <b>1.42</b>              | ↑ in MS ( <i>Angerstein et al 2012</i> ), dysregulated in MS ( <i>Keller et al., 2013</i> ), ↑ decreased CXCL13 expression, alleviating neuropathic pain ( <i>Jiang et al., 2016</i> )                                                |
| <b>miR-1260b</b>                                                                                                                            | <b>1.30</b>              | ↑ in Addison's Disease ( <i>Fichna et al., 2021</i> ), ↓ in glaucoma ( <i>Martinez et al., 2021</i> )                                                                                                                                 |
| <b>miR-6085</b>                                                                                                                             | <b>1.27</b>              |                                                                                                                                                                                                                                       |
| <b>miR-142-3p</b>                                                                                                                           | <b>1.09</b>              | ↑ in MS with ↓ IL-1β ( <i>De Vito et al., 2021, Mandolesi et al., 2017</i> ), ↑ in MS ( <i>Arruda et al., 2014, Ma et al., 2014, Luo et al., 2018</i> )                                                                               |
| <b>miR-29b-3p</b>                                                                                                                           | <b>1.01</b>              | ↑ in RRMS in CD4 <sup>+</sup> T, ↓ after INF-β ( <i>Fattahi et al., 2018</i> ), ↓ Th <sub>17</sub> e IL-17A after INF-β treatment, whereas miRNA levels remained constant ( <i>Karimi et al., 2021</i> )                              |
| <b>miR-29c-3p</b>                                                                                                                           | <b>0.96</b>              | ↓ in MS ( <i>Gandhi et al., 2015</i> ), ↓ in GMLS (gray matter lesions in MS) ( <i>Tripathi et al., 2021</i> ) ↓ in MS ( <i>Hecker et al., 2013</i> )                                                                                 |
| <b>miR-30c-5p</b>                                                                                                                           | <b>0.92</b>              | ↑ in MS (both RR and PP) in CSF ( <i>Amoruso et al., 2020</i> ), ↓ in CI (cognitive impairment) vs non-CI MS patients ( <i>Lovera et al., 2020</i> ), ↓ PD ( <i>Yourefi et al., 2022</i> ), ↓ in sALS ( <i>Liguori et al., 2018</i> ) |
| <b>miR-150-5p</b>                                                                                                                           | <b>0.92</b>              | ↑ in MS and remains ↑ after Natalizumab treatment ( <i>Bergman et al., 2016</i> ), miRNA enriched in microglia controlling synaptic plasticity and cognition ( <i>Scaroni et al., 2022</i> )                                          |
| <b>miR-874-3p</b>                                                                                                                           | <b>0.90</b>              | ↑ in PD ( <i>Chen et al., 2020</i> ), ↑ in hippocampal sclerosis ( <i>Bencurova et al., 2017</i> ), ↓ in AD ( <i>Van den Berg et al., 2019</i> )                                                                                      |
| <b>miR-155-5p</b>                                                                                                                           | <b>0.88</b>              | ↑ in MS ( <i>Maciak et al., 2021</i> ), ↑ in MS ( <i>McCoy et al., 2017</i> ), ↓ in SPMS targeting SOCS6 in CD4 <sup>+</sup> T ( <i>Sanders et al., 2016</i> )                                                                        |
| <b>miR-146b-5p</b>                                                                                                                          | <b>0.86</b>              | ↑ in MS, ↓ after dmf treatment which targets NF-κβ pathway to avoid Th transition ( <i>Giuliani et al., 2021</i> ), ↑ in MS correlated with EDSS ( <i>Mozo et al., 2022</i> ), ↑ in MS ( <i>Magheri et al., 2022</i> )                |
| <b>miR-940</b>                                                                                                                              | <b>0.86</b>              | possible biomarker for AD ( <i>Zakeri et al., 2020</i> )                                                                                                                                                                              |
| <b>miR-5100</b>                                                                                                                             | <b>0.80</b>              | ↑ in familial MS different from sporadic MS ( <i>Altun et al., 2017, Harirchian et al., 2018</i> ), ↑ in AD ( <i>Sun et al., 2021</i> )                                                                                               |
| <b>miR-29a-3p</b>                                                                                                                           | <b>0.78</b>              | ↓ in MS ( <i>Chen et al., 2018</i> ), ↓ in MS ( <i>Ghandi et al., 2015</i> ) ↓ In RRMS ( <i>Dolati et al., 2018</i> )                                                                                                                 |
| <b>miR-222-3p</b>                                                                                                                           | <b>0.73</b>              | ↑ in TSC ( <i>Trelinska et al., 2016</i> ) ↑ in Huntington Disease ( <i>Phanelles et al., 2016</i> ), ↓ in PD ( <i>Chen et al., 2018</i> )                                                                                            |

|                    |              |                                                                                                                                                                                                                                                                                                                      |
|--------------------|--------------|----------------------------------------------------------------------------------------------------------------------------------------------------------------------------------------------------------------------------------------------------------------------------------------------------------------------|
| <b>miR-30b-5p</b>  | <b>0.71</b>  | ↓ in RRMS ( <i>Groen et al., 2018</i> ), biomarker for RRMS, AD and PD ( <i>Ebrahimkhani et al., 2017</i> ), ↓ in NMOSD (Neuromyelitis Optica Spectrum disorders) ( <i>Chen et al., 2017</i> ), dysregulated in all neurodegenerative diseases ( <i>Brennan et al., 2019</i> )                                       |
| <b>miR-7977</b>    | <b>0.70</b>  | ↑ in ALS ( <i>Chen et al., 2021</i> ) ↑ in CD4 <sup>+</sup> T in Addison's Disease ( <i>Fichna et al., 2021</i> )                                                                                                                                                                                                    |
| <b>miR-4286</b>    | <b>0.68</b>  | ↑ in MS, targets synaptotagmin-7 ( <i>syt7</i> ) ( <i>Fritsche et al., 2019</i> )                                                                                                                                                                                                                                    |
| <b>miR-664b-3p</b> | <b>0.67</b>  | ↑ in AD ( <i>Wen et al., 2022</i> )                                                                                                                                                                                                                                                                                  |
| <b>miR-342-3p</b>  | <b>0.64</b>  | ↑ in RRMS ( <i>Dolati et al., 2018</i> ), ↑ in ALS ( <i>Wen-Lo et al., 2021</i> ) ↓ in AD ( <i>Chen et al., 2018</i> )                                                                                                                                                                                               |
| <b>miR-361-3p</b>  | <b>0.60</b>  | ↑ in AD inhibits β-amyloid ( <i>Ji et al., 2019</i> ) in mice, ↓ in Huntington disease ( <i>Dhawan 2021</i> )                                                                                                                                                                                                        |
| <b>miR-638</b>     | <b>-0.91</b> | ↓ in MS ( <i>Mandegarfarid et al., 2022</i> ) ↓ in the skeletal muscle in ALS patients ( <i>Menges et al., 2021</i> )                                                                                                                                                                                                |
| <b>miR-130a-3p</b> | <b>-0.79</b> | ↑ in MS ( <i>Hanselmann et al., 2020</i> ), ↑ in TSC ( <i>Trelinska et al., 2016</i> ), ↓ in ALS ( <i>Liguori et al., 2018</i> ), ↓ in AD ( <i>Lu et al., 2022</i> ) ↓ in Chron's Disease it provokes ↑ inflammation ( <i>Pang et al., 2020</i> ), ↓ in psoriasis ( <i>Huang et al., 2022, Alatas et al., 2020</i> ) |
| <b>miR-151a-5p</b> | <b>-0.69</b> | ↓ in MS (white matter lesions) ( <i>Hanselmann et al., 2020</i> ), ↑ ALS ( <i>Dobrowolny et al., 2021</i> ) ↑ in PD ( <i>Tong et al., 2022</i> )                                                                                                                                                                     |
| <b>miR-126-3p</b>  | <b>-0.68</b> | ↓ in MS after Natalizumab treatment ( <i>Mancuso et al., 2022, Meira et al., 2014</i> )                                                                                                                                                                                                                              |
| <b>miR-151a-3p</b> | <b>-0.68</b> | ↓ in MS ( <i>Keller et al., 2013</i> ), ↑ in ischemic stroke ( <i>Sorensen et al., 2014</i> ), ↑ autism spectrum disorder ( <i>Asfar et al., 2019</i> )                                                                                                                                                              |
| <b>miR-199a-3p</b> | <b>-0.64</b> | ↓ serum MS vs HC ↓ remitting vs relapsing ( <i>Regev et al., 2018</i> ), it promotes ERK-mediated IL-10 production in systemic lupus erythematosus ( <i>Su et al., 2019</i> )                                                                                                                                        |

Supplementary Table S2

| <b>miRNA profiles on PBMCs post-treatment, T1 (CLA T1 vs OCRE T1) compared to known literature</b> |                                     |                                                                                                                                                              |
|----------------------------------------------------------------------------------------------------|-------------------------------------|--------------------------------------------------------------------------------------------------------------------------------------------------------------|
| <b>miRNAs</b>                                                                                      | <b>Log<sub>2</sub>F<sub>C</sub></b> | <b>Previous studies on MS and other neurodegenerative diseases</b>                                                                                           |
| <b>miR-4530</b>                                                                                    | <b>-0.90</b>                        | ↓ in ALS (Taguchi et al., 2018), dysregulated in ALS (Kmetzsch et al., 2022)                                                                                 |
| <b>miR-4507</b>                                                                                    | <b>-0.86</b>                        | ↓ in ALS (Katsu et al., 2019)                                                                                                                                |
| <b>miR-4443</b>                                                                                    | <b>-0.85</b>                        | ↑ in PD (Salemi et al., 2021), dysregulated in ALS (Wen Lo et al., 2021), It induces CD4 <sup>+</sup> dysfunction (Qi et al, 2017; Li et al, 2020)           |
| <b>miR-6780b-5p</b>                                                                                | <b>-0.83</b>                        |                                                                                                                                                              |
| <b>miR-6763-5p</b>                                                                                 | <b>-0.83</b>                        |                                                                                                                                                              |
| <b>miR-6740-5p</b>                                                                                 | <b>-0.81</b>                        | ↑ in Obsessive-Compulsive Disorder (Aydin et al., 2022)                                                                                                      |
| <b>miR-1268b</b>                                                                                   | <b>-0.79</b>                        | ↑ in psoriasis (Solvin et al., 2021), biomarker of ischemic stroke (Deng et al., 2022)                                                                       |
| <b>miR-4442</b>                                                                                    | <b>-0.76</b>                        | ↓ in idiopathic inflammatory myopathy (IIM) (Chen et al., 2018)                                                                                              |
| <b>miR-4713-3p</b>                                                                                 | <b>-0.71</b>                        |                                                                                                                                                              |
| <b>miR-1202</b>                                                                                    | <b>-0.68</b>                        | ↑ in hippocampal sclerosis (Gattas et al., 2022), ↑ glutamate receptor-4 (GRM4) in major depression state (MD) (Wang et al., 2021, Chakraborty et al., 2019) |
| <b>miR-6165</b>                                                                                    | <b>-0.63</b>                        | biomarker of Moyamoya Disease (MMD) (Wang et al., 2021), ↑ in apoptotic role provoked by p75NTR (Shi et al., 2015)                                           |
| <b>miR-6131</b>                                                                                    | <b>-0.61</b>                        | ↑ in AD (Lu et al., 2021)                                                                                                                                    |

Supplementary Table S3

| Effects of CLA treatment on PBMCs miRNA profiles at T1. Data comparison to known literature |                                 |                                                                                                                                                                                                                                                                                                                      |
|---------------------------------------------------------------------------------------------|---------------------------------|----------------------------------------------------------------------------------------------------------------------------------------------------------------------------------------------------------------------------------------------------------------------------------------------------------------------|
| miRNAs                                                                                      | Log <sub>2</sub> F <sub>C</sub> | Previous studies on MS and other neurodegenerative diseases                                                                                                                                                                                                                                                          |
| <b>miR-151a-3p</b>                                                                          | <b>0.76</b>                     | ↓ in MS ( <i>Keller et al., 2013</i> ), ↑ in ischemic stroke ( <i>Sorensen et al., 2014</i> ), ↑ Autism                                                                                                                                                                                                              |
| <b>miR-130a-3p</b>                                                                          | <b>0.78</b>                     | ↑ in MS ( <i>Hanselmann et al., 2020</i> ), ↑ in TSC ( <i>Trelinska et al., 2016</i> ), ↓ in ALS ( <i>Liguori et al., 2018</i> ), ↓ in AD ( <i>Lu et al., 2022</i> ) ↓ in Chron's Disease it provokes ↑ inflammation ( <i>Pang et al., 2020</i> ), ↓ in psoriasis ( <i>Huang et al., 2022, Alatas et al., 2020</i> ) |
| <b>miR-126-3p</b>                                                                           | <b>0.81</b>                     | ↓ in MS after Natalizumab treatment ( <i>Mancuso et al., 2022, Meira et al., 2014</i> )                                                                                                                                                                                                                              |
| <b>miR-151a-5p</b>                                                                          | <b>0.63</b>                     | ↓ in MS (white matter lesions) ( <i>Hanselmann et al., 2020</i> ), ↑ ALS ( <i>Dobrowolny et al., 2021</i> ) ↑ in PD ( <i>Tong et al., 2022</i> )                                                                                                                                                                     |
| <b>miR-151b</b>                                                                             | <b>0.60</b>                     | ↓ in sALS ( <i>Liguori et al., 2018</i> )                                                                                                                                                                                                                                                                            |
| <b>miR-326</b>                                                                              | <b>0.85</b>                     | ↑ MS active lesions ↓ after Natalizumab treatment ( <i>Gallardo Perez et al., 2022</i> ), ↑ in RRMS, involved in Th17 maturation and differentiation ( <i>Azimi et al., 2019</i> ), ↑ inflammation (IFN-γ, IL-17) ( <i>Fattahi et al., 2019, Karimi et al., 2020</i> )                                               |
| <b>miR-584-5p</b>                                                                           | <b>0.96</b>                     | dysregulated in MS ( <i>Angersten et al., 2012</i> ), dysregulated in pediatric Epilepsy ( <i>Gu et al., 2020</i> ), ↑ in IV lupus nephritis ( <i>Quiroz et al., 2017</i> )                                                                                                                                          |
| <b>miR-199a-3p</b>                                                                          | <b>0.66</b>                     | ↓ serum MS vs HC ↓ remitting vs relapsing ( <i>Regev et al., 2018</i> ) it promotes ERK-mediated IL-10 production in systemic lupus erythematosus ( <i>Su et al., 2019</i> )                                                                                                                                         |
| <b>miR-23b-3p</b>                                                                           | <b>0.64</b>                     | ↑ in remitting MS ( <i>Baulina et al., 2018</i> ), ↑ keeps Th/Treg balanced in intracranial aneurysm ( <i>Sun et al., 2020</i> )                                                                                                                                                                                     |
| <b>miR-221-3p</b>                                                                           | <b>0.69</b>                     | ↑ in MS and targets immunological, autophagic and ATPases components ( <i>Liguori et al., 2017</i> ), biomarker in PD ( <i>Schultz et al., 2019</i> )                                                                                                                                                                |
| <b>miR-27b-3p</b>                                                                           | <b>0.60</b>                     | ↑ in MS ( <i>Dolati et al., 2018</i> ), ↑ in MS ( <i>Hanselmann et al., 2022</i> ) ↓ in MS, it generally keeps the BBB less permeable targeting Clandin-5 in the WNT/β-catenin pathway ( <i>Harati et al., 2022</i> )                                                                                                |
| <b>miR-199a-5p</b>                                                                          | <b>0.77</b>                     | ↓ in remitting phase in CD <sup>+</sup> T cells ( <i>Ghadiri et al., 2018</i> ), ↓ in MS ( <i>Luo et al., 2018</i> )                                                                                                                                                                                                 |
| <b>miR-486-5p</b>                                                                           | <b>0.76</b>                     | ↓ in MS ( <i>Manna et al., 2018</i> ), dysregulated in MS ( <i>Martinez et al., 2022, Regev et al., 2018</i> )                                                                                                                                                                                                       |
| <b>miR-148b-3p</b>                                                                          | <b>0.60</b>                     | ↓ in MS ( <i>Liguori et al., 2018</i> ), it is a MS biomarker targeting ECMR, PI3K-Akt, TGFβ ( <i>Prabahar et al., 2022</i> )                                                                                                                                                                                        |
| <b>miR-150-5p</b>                                                                           | <b>-0.62</b>                    | ↑ in MS and remains ↑ after Natalizumab treatment ( <i>Bergman et al., 2016</i> ), miR enriched in microglia controlling synaptic plasticity and cognition ( <i>Scaroni et al., 2022</i> )                                                                                                                           |
| <b>miR-197-5p</b>                                                                           | <b>-0.63</b>                    | ↓ in MS in T-cells and targets TNFSF14 ( <i>Jernas et al., 2013</i> ), dysregulated in Autism ( <i>Kichukova et al., 2021</i> ), ↑ in TLE ( <i>Yakovleva et al., 2022</i> )                                                                                                                                          |

|                   |              |                                                                                                                                                                                                                                                               |
|-------------------|--------------|---------------------------------------------------------------------------------------------------------------------------------------------------------------------------------------------------------------------------------------------------------------|
| <b>miR-29c-3p</b> | <b>-0.63</b> | ↓ in MS ( <i>Gandhi et al., 2015</i> ), ↓ in GMLS (gray matter lesions in MS) ( <i>Tripathi et al., 2021</i> ) ↓ in MS ( <i>Hecker et al., 2013</i> )                                                                                                         |
| <b>miR-342-5p</b> | <b>-0.58</b> | ↑ in RRMS ( <i>Ma et al., 2014</i> ), ↑ in MS ( <i>Gandhi et al., 2015, Hecker et al., 2013</i> ), It regulates Neural Stem Cell Differentiation ( <i>Gao et al, 2017</i> ). It is required for TNF $\alpha$ microglia activation ( <i>Bras et al, 2020</i> ) |
| <b>miR-4443</b>   | <b>-0.60</b> | ↑ in PD ( <i>Salemi et al., 2021</i> ), dysregulated in ALS ( <i>Wen Lo et al., 2021</i> ), It induces CD4+ dysfunction ( <i>Qi et al, 2017; Li et al, 2020</i> )                                                                                             |
| <b>miR-4505</b>   | <b>-0.64</b> | ↑ in ALS ( <i>Freischmidt et al., 2014</i> )                                                                                                                                                                                                                  |
| <b>miR-4507</b>   | <b>-0.61</b> | ↓ in ALS ( <i>Katsu et al., 2019</i> )                                                                                                                                                                                                                        |
| <b>miR- 8069</b>  | <b>-0.59</b> |                                                                                                                                                                                                                                                               |



**Supplementary Table S4**

| CLA T1 vs pre-CLA |                     | pre-CLA vs HC       | CLA T1 vs HC        | pre-CLA vs pre-OCRE |
|-------------------|---------------------|---------------------|---------------------|---------------------|
| miRNAs            | Log <sub>2</sub> FC | Log <sub>2</sub> FC | Log <sub>2</sub> FC | Log <sub>2</sub> FC |
| miR-584-5p        | <b>0.856</b>        | <b>-0.953</b>       | -0.053              | <b>-0.544</b>       |
| miR-130a-3p       | <b>0.817</b>        | <b>-1.090</b>       | -0.232              | <b>-0.795</b>       |
| miR-126-3p        | <b>0.802</b>        | <b>-1.151</b>       | -0.330              | <b>-0.678</b>       |
| miR-199a-5p       | <b>0.783</b>        | <b>-0.838</b>       | -0.057              | -0.187              |
| miR-486-5p        | <b>0.748</b>        | <b>-0.777</b>       | -0.006              | <b>-0.688</b>       |
| miR-199a-3p       | <b>0.746</b>        | <b>-1.135</b>       | -0.383              | <b>-0.642</b>       |
| miR-151a-3p       | <b>0.740</b>        | <b>-1.192</b>       | -0.434              | <b>-0.676</b>       |
| miR-326           | <b>0.726</b>        | -0.221              | <b>0.537</b>        | -0.238              |
| miR-221-3p        | <b>0.700</b>        | <b>-0.714</b>       | 0.001               | -0.332              |
| miR-151a-5p       | <b>0.668</b>        | <b>-0.906</b>       | -0.218              | <b>-0.694</b>       |
| miR-23b-3p        | <b>0.656</b>        | <b>-0.638</b>       | 0.036               | <b>-0.506</b>       |
| miR-148b-3p       | <b>0.615</b>        | -0.244              | 0.365               | -0.215              |
| miR-27b-3p        | <b>0.608</b>        | <b>-0.770</b>       | -0.161              | -0.420              |
| miR-151b          | <b>0.603</b>        | <b>-0.681</b>       | -0.068              | <b>-0.554</b>       |
| miR-652-3p        | <b>0.536</b>        | -0.366              | 0.171               | -0.400              |
| miR-22-3p         | <b>0.503</b>        | <b>-0.727</b>       | -0.224              | -0.468              |
| miR-324-5p        | 0.495               | -0.413              | 0.083               | -0.478              |
| miR-185-5p        | 0.468               | <b>-0.612</b>       | -0.144              | -0.313              |
| miR-24-3p         | 0.335               | -0.368              | -0.033              | -0.180              |
| miR-17-5p         | 0.307               | -0.391              | -0.084              | -0.125              |
| miR-376c-3p       | 0.258               | <b>-1.401</b>       | <b>-1.144</b>       | <b>-0.680</b>       |
| miR-376a-3p       | 0.208               | <b>-1.181</b>       | <b>-0.973</b>       | -0.403              |
| miR-197-3p        | -0.022              | <b>0.648</b>        | <b>0.625</b>        | 0.227               |
| let-7c-5p         | -0.033              | 0.466               | 0.433               | 0.195               |
| miR-181b-5p       | -0.153              | <b>0.619</b>        | 0.466               | 0.254               |
| miR-186-5p        | -0.203              | <b>0.830</b>        | <b>0.628</b>        | <b>1.416</b>        |
| miR-6826-5p       | -0.209              | -0.393              | <b>-0.602</b>       | -0.381              |
| miR-5100          | -0.292              | <b>0.950</b>        | <b>0.658</b>        | <b>0.799</b>        |
| miR-6165          | -0.304              | <b>-0.571</b>       | <b>-0.876</b>       | -0.372              |
| miR-1268b         | -0.307              | <b>-0.773</b>       | <b>-1.079</b>       | -0.441              |
| miR-1260a         | -0.326              | <b>1.628</b>        | <b>1.302</b>        | <b>1.599</b>        |
| miR-1202          | -0.335              | <b>-0.634</b>       | <b>-0.968</b>       | -0.375              |
| miR-4281          | -0.341              | -0.386              | <b>-0.728</b>       | -0.081              |
| miR-1260b         | -0.360              | <b>1.232</b>        | <b>0.871</b>        | <b>1.303</b>        |
| miR-6763-5p       | -0.361              | <b>-0.522</b>       | <b>-0.883</b>       | -0.416              |
| miR-1207-5p       | -0.371              | -0.390              | <b>-0.761</b>       | -0.130              |
| miR-874-3p        | -0.382              | <b>0.684</b>        | 0.303               | <b>0.895</b>        |
| miR-940           | -0.422              | <b>1.290</b>        | <b>0.867</b>        | <b>0.856</b>        |
| miR-3162-5p       | -0.429              | -0.247              | <b>-0.676</b>       | -0.124              |
| miR-6740-5p       | -0.476              | <b>-0.618</b>       | <b>-1.093</b>       | -0.495              |
| miR-6717-5p       | -0.477              | <b>-0.574</b>       | <b>-1.051</b>       | -0.337              |
| miR-3198          | -0.479              | <b>-0.742</b>       | <b>-1.221</b>       | -0.293              |
| miR-4713-3p       | -0.479              | -0.291              | <b>-0.771</b>       | -0.349              |
| miR-6879-5p       | -0.486              | -0.138              | <b>-0.625</b>       | -0.209              |
| miR-6127          | -0.495              | -0.325              | <b>-0.820</b>       | -0.137              |
| miR-6131          | <b>-0.504</b>       | -0.425              | <b>-0.929</b>       | -0.271              |
| miR-4442          | <b>-0.514</b>       | -0.375              | <b>-0.889</b>       | -0.208              |
| miR-638           | <b>-0.539</b>       | <b>-0.856</b>       | <b>-1.395</b>       | <b>-0.908</b>       |
| miR-29b-3p        | <b>-0.568</b>       | <b>0.743</b>        | 0.175               | <b>1.009</b>        |
| miR-6780b-5p      | <b>-0.579</b>       | -0.321              | <b>-0.901</b>       | -0.330              |
| miR-342-5p        | <b>-0.586</b>       | 0.319               | -0.256              | 0.422               |
| miR-8069          | <b>-0.598</b>       | 0.287               | -0.306              | <b>0.562</b>        |
| miR-4443          | <b>-0.609</b>       | 0.124               | -0.468              | -0.292              |
| miR-4507          | <b>-0.618</b>       | 0.004               | <b>-0.591</b>       | -0.079              |
| miR-150-5p        | <b>-0.626</b>       | <b>0.525</b>        | -0.111              | <b>0.920</b>        |
| miR-29c-3p        | <b>-0.630</b>       | <b>0.549</b>        | -0.089              | <b>0.962</b>        |
| miR-4505          | <b>-0.641</b>       | 0.103               | <b>-0.523</b>       | 0.257               |
| miR-197-5p        | <b>-0.667</b>       | -0.027              | <b>-0.712</b>       | 0.212               |

Supplementary Table S5

|                                                      | Age         | Sex   | Disease Duration at T1 (years) | EDSS T0   | EDSS T1   | FI T0       | FI T1       | Previous Therapy | New lesions T0 | GD+ Enhancing Lesions T0 | n. of relapses in the last 6 month |
|------------------------------------------------------|-------------|-------|--------------------------------|-----------|-----------|-------------|-------------|------------------|----------------|--------------------------|------------------------------------|
| <b>CLA:<br/>Mean +- SD</b>                           | 39.0 ± 7.5  |       | 5.6 ± 6.9                      | 1.5 ± 1.1 | 1.5 ± 1.2 | 0.11 ± 0.06 | 0.11 ± 0.06 |                  |                |                          |                                    |
| <b>OCRE:<br/>Mean +- SD</b>                          | 40.5 ± 10.4 |       | 8.8 ± 9.1                      | 2.6 ± 1.8 | 2.2 ± 1.8 | 0.11 ± 0.07 | 0.11 ± 0.07 |                  |                |                          |                                    |
| <b>M-W test,<br/>two-sided,<br/>CLA vs OCRE</b>      | 0.757       |       | 0.194                          | 0.052     | 0.407     | 0.912       | 0.889       |                  |                |                          |                                    |
| <b>Fisher's test,<br/>two-sided,<br/>CLA vs OCRE</b> |             | 1.000 |                                |           |           |             |             | 0.241            | 1.000          | 0.241                    | 1.000                              |

Supplementary Table S6

|                  | pre-CLA     |             |             | CLA T1      |             |             | pre-OCRE    |             |             | OCRE T1     |             |             |
|------------------|-------------|-------------|-------------|-------------|-------------|-------------|-------------|-------------|-------------|-------------|-------------|-------------|
|                  | White_cells | Neutrophils | Lymphocytes | White_cells | Neutrophils | Lymphocytes | White_cells | Neutrophils | Lymphocytes | White_cells | Neutrophils | Lymphocytes |
| hsa-let-7a-5p    | 0.676       | 0.572       | 0.528       | 0.295       | 0.373       | 0.028       | 0.380       | 0.409       | 0.147       | 0.408       | 0.139       | 0.263       |
| hsa-let-7b-5p    | 0.517       | 0.472       | 0.192       | 0.051       | 0.257       | -0.310      | -0.078      | 0.105       | -0.272      | 0.260       | 0.174       | 0.072       |
| hsa-let-7c-5p    | 0.035       | -0.171      | 0.565       | -0.402      | -0.397      | -0.030      | 0.194       | 0.436       | -0.399      | 0.364       | 0.325       | 0.021       |
| hsa-let-7d-5p    | 0.214       | 0.062       | 0.485       | 0.116       | 0.280       | -0.095      | 0.381       | 0.454       | 0.050       | 0.387       | 0.267       | 0.089       |
| hsa-let-7e-5p    | 0.314       | 0.283       | 0.059       | 0.233       | 0.488       | -0.303      | 0.012       | 0.217       | -0.300      | 0.006       | 0.171       | -0.226      |
| hsa-let-7f-5p    | 0.307       | 0.277       | 0.311       | 0.318       | 0.029       | 0.647       | 0.543       | 0.469       | 0.355       | 0.456       | 0.170       | 0.281       |
| hsa-let-7g-5p    | 0.342       | 0.381       | 0.148       | 0.027       | -0.207      | 0.444       | 0.493       | 0.346       | 0.544       | 0.391       | -0.119      | 0.537       |
| hsa-let-7i-5p    | 0.727       | 0.747       | 0.196       | 0.427       | 0.511       | 0.055       | 0.409       | 0.268       | 0.580       | 0.403       | 0.090       | 0.297       |
| hsa-miR-101-3p   | -0.220      | -0.145      | -0.107      | -0.285      | -0.459      | 0.195       | 0.469       | 0.323       | 0.395       | 0.385       | 0.129       | 0.273       |
| hsa-miR-103a-3p  | 0.355       | 0.318       | 0.100       | 0.265       | 0.530       | -0.297      | 0.203       | 0.304       | -0.094      | 0.355       | 0.320       | -0.014      |
| hsa-miR-106b-5p  | 0.085       | 0.199       | -0.201      | -0.207      | -0.267      | 0.075       | 0.482       | 0.288       | 0.505       | 0.329       | 0.071       | 0.250       |
| hsa-miR-107      | 0.120       | -0.049      | 0.390       | 0.236       | 0.327       | 0.105       | 0.325       | 0.377       | 0.066       | 0.380       | 0.338       | -0.003      |
| hsa-miR-1202     | 0.556       | 0.557       | 0.042       | 0.224       | 0.265       | 0.001       | -0.023      | -0.035      | 0.126       | -0.112      | -0.424      | 0.339       |
| hsa-miR-1207-5p  | 0.387       | 0.364       | 0.124       | 0.396       | 0.170       | 0.466       | -0.033      | -0.153      | 0.207       | -0.170      | -0.065      | -0.094      |
| hsa-miR-1225-5p  | 0.116       | 0.191       | -0.159      | 0.401       | 0.138       | 0.520       | -0.072      | -0.039      | -0.106      | -0.453      | -0.247      | -0.149      |
| hsa-miR-1246     | -0.254      | -0.212      | -0.172      | 0.399       | 0.524       | -0.118      | -0.353      | -0.378      | -0.180      | -0.583      | -0.373      | -0.193      |
| hsa-miR-1249-3p  | 0.479       | 0.503       | 0.044       | 0.708       | 0.745       | 0.128       | -0.615      | -0.416      | -0.472      | -0.475      | -0.415      | -0.052      |
| hsa-miR-125a-5p  | 0.142       | 0.127       | -0.018      | 0.148       | 0.383       | -0.310      | 0.021       | 0.162       | -0.186      | 0.083       | 0.211       | -0.191      |
| hsa-miR-125b-5p  | -0.504      | -0.488      | 0.001       | -0.645      | -0.706      | -0.110      | 0.083       | 0.354       | -0.584      | 0.145       | 0.465       | -0.398      |
| hsa-miR-126-3p   | -0.080      | -0.050      | -0.105      | 0.270       | 0.485       | -0.230      | 0.398       | 0.355       | 0.252       | 0.213       | 0.287       | -0.145      |
| hsa-miR-1260a    | -0.489      | -0.470      | -0.010      | -0.660      | -0.784      | -0.021      | 0.013       | 0.171       | -0.413      | 0.350       | 0.367       | 0.003       |
| hsa-miR-1260b    | -0.481      | -0.475      | 0.021       | -0.640      | -0.800      | 0.043       | -0.065      | 0.235       | -0.400      | 0.373       | 0.302       | 0.091       |
| hsa-miR-1268b    | 0.444       | 0.504       | -0.103      | 0.408       | 0.423       | 0.071       | 0.023       | -0.043      | 0.071       | -0.292      | -0.299      | 0.044       |
| hsa-miR-1273g-3p | 0.662       | 0.659       | 0.099       | 0.274       | 0.247       | 0.161       | 0.111       | 0.279       | -0.134      | -0.128      | -0.267      | 0.241       |
| hsa-miR-128-3p   | 0.121       | -0.037      | 0.458       | 0.015       | -0.047      | 0.264       | 0.405       | 0.386       | 0.167       | 0.338       | 0.169       | 0.121       |
| hsa-miR-130a-3p  | 0.069       | 0.124       | -0.054      | 0.185       | 0.481       | -0.516      | 0.236       | 0.251       | 0.040       | 0.381       | 0.477       | -0.156      |
| hsa-miR-130b-3p  | -0.014      | -0.046      | 0.024       | -0.342      | -0.139      | -0.383      | -0.289      | -0.251      | -0.141      | 0.257       | 0.244       | -0.049      |
| hsa-miR-140-3p   | -0.323      | -0.232      | -0.146      | -0.615      | -0.726      | -0.001      | 0.142       | 0.088       | 0.079       | 0.479       | 0.079       | 0.413       |
| hsa-miR-140-5p   | -0.016      | 0.091       | -0.144      | -0.178      | -0.223      | -0.022      | 0.334       | 0.153       | 0.383       | 0.251       | -0.186      | 0.484       |
| hsa-miR-142-3p   | -0.327      | -0.251      | -0.128      | -0.336      | -0.484      | 0.111       | 0.393       | 0.287       | 0.193       | 0.374       | 0.130       | 0.279       |
| hsa-miR-142-5p   | -0.237      | -0.138      | -0.198      | -0.440      | -0.590      | 0.116       | 0.457       | 0.276       | 0.409       | 0.404       | 0.144       | 0.277       |
| hsa-miR-146a-5p  | -0.355      | -0.374      | 0.045       | -0.319      | -0.561      | 0.363       | 0.325       | 0.361       | -0.003      | 0.368       | 0.221       | 0.120       |
| hsa-miR-146b-5p  | -0.268      | -0.274      | 0.110       | -0.276      | -0.618      | 0.475       | 0.324       | 0.324       | 0.053       | 0.271       | -0.037      | 0.354       |
| hsa-miR-148a-3p  | -0.048      | -0.068      | 0.049       | 0.290       | 0.127       | 0.471       | 0.479       | 0.347       | 0.435       | 0.276       | 0.072       | 0.169       |
| hsa-miR-148b-3p  | -0.283      | -0.296      | 0.046       | 0.095       | 0.126       | -0.076      | 0.403       | 0.339       | 0.172       | 0.433       | 0.336       | 0.044       |
| hsa-miR-150-5p   | 0.081       | 0.162       | 0.040       | -0.181      | -0.358      | 0.238       | 0.246       | 0.251       | 0.154       | 0.199       | -0.268      | 0.501       |
| hsa-miR-151a-3p  | -0.053      | -0.026      | -0.065      | 0.193       | 0.541       | -0.495      | 0.015       | 0.083       | -0.118      | 0.108       | 0.314       | -0.301      |
| hsa-miR-151a-5p  | -0.074      | -0.088      | 0.061       | 0.396       | 0.694       | -0.376      | 0.086       | 0.168       | -0.092      | 0.221       | 0.390       | -0.257      |
| hsa-miR-151b     | -0.085      | -0.116      | 0.089       | 0.456       | 0.719       | -0.292      | 0.173       | 0.257       | -0.062      | 0.181       | 0.330       | -0.236      |
| hsa-miR-155-5p   | -0.646      | -0.652      | -0.019      | -0.772      | -0.874      | -0.060      | 0.147       | 0.159       | -0.107      | 0.540       | 0.570       | -0.045      |
| hsa-miR-15a-5p   | 0.030       | 0.107       | -0.099      | -0.149      | -0.398      | 0.399       | 0.439       | 0.246       | 0.454       | 0.375       | 0.078       | 0.315       |
| hsa-miR-15b-5p   | 0.242       | 0.164       | 0.150       | 0.509       | 0.672       | -0.117      | 0.386       | 0.471       | 0.030       | 0.403       | 0.300       | 0.069       |
| hsa-miR-16-5p    | 0.322       | 0.415       | -0.103      | -0.038      | -0.225      | 0.427       | 0.542       | 0.384       | 0.507       | 0.355       | 0.089       | 0.269       |
| hsa-miR-17-3p    | -0.227      | -0.056      | -0.344      | -0.051      | 0.014       | -0.206      | 0.294       | 0.116       | 0.322       | 0.548       | 0.212       | 0.336       |
| hsa-miR-17-5p    | -0.063      | 0.026       | -0.143      | -0.350      | -0.195      | -0.301      | 0.458       | 0.397       | 0.258       | 0.348       | 0.243       | 0.069       |
| hsa-miR-181a-5p  | 0.106       | 0.195       | -0.126      | 0.158       | 0.306       | -0.272      | -0.373      | -0.183      | -0.512      | 0.289       | 0.358       | -0.128      |
| hsa-miR-181b-5p  | -0.042      | -0.134      | 0.204       | -0.202      | -0.385      | 0.270       | -0.168      | -0.034      | -0.341      | 0.371       | 0.374       | -0.014      |
| hsa-miR-185-5p   | -0.085      | -0.031      | -0.125      | 0.109       | 0.355       | -0.357      | 0.489       | 0.417       | 0.235       | 0.295       | 0.246       | -0.007      |
| hsa-miR-186-5p   | -0.507      | -0.494      | -0.007      | -0.628      | -0.749      | 0.004       | 0.396       | 0.396       | -0.027      | 0.394       | 0.233       | 0.171       |
| hsa-miR-18a-5p   | -0.226      | -0.164      | -0.148      | -0.327      | -0.338      | -0.098      | 0.579       | 0.435       | 0.398       | 0.324       | 0.240       | 0.040       |
| hsa-miR-18b-5p   | -0.242      | -0.189      | -0.129      | -0.215      | -0.327      | 0.127       | 0.578       | 0.422       | 0.422       | 0.285       | 0.216       | 0.033       |
| hsa-miR-192-5p   | 0.024       | 0.105       | -0.032      | -0.056      | -0.262      | 0.299       | 0.371       | 0.230       | 0.390       | 0.190       | -0.293      | 0.519       |
| hsa-miR-197-3p   | -0.376      | -0.391      | 0.058       | -0.452      | -0.355      | -0.340      | -0.250      | -0.044      | -0.530      | 0.260       | 0.313       | -0.053      |
| hsa-miR-197-5p   | 0.190       | 0.303       | -0.246      | 0.208       | 0.158       | 0.062       | -0.177      | -0.117      | -0.193      | -0.416      | -0.321      | -0.030      |
| hsa-miR-1973     | -0.152      | -0.006      | -0.411      | 0.485       | 0.712       | -0.308      | -0.345      | -0.388      | -0.021      | -0.641      | -0.307      | -0.318      |
| hsa-miR-199a-3p  | -0.018      | 0.006       | -0.047      | 0.307       | 0.552       | -0.274      | 0.416       | 0.343       | 0.305       | 0.201       | 0.172       | -0.032      |
| hsa-miR-199a-5p  | -0.255      | -0.183      | -0.189      | -0.173      | 0.083       | -0.472      | 0.487       | 0.502       | -0.002      | 0.235       | 0.330       | -0.169      |
| hsa-miR-19a-3p   | -0.080      | 0.033       | -0.212      | -0.275      | -0.386      | 0.112       | 0.509       | 0.346       | 0.411       | 0.303       | 0.110       | 0.194       |
| hsa-miR-19b-3p   | -0.019      | 0.100       | -0.203      | -0.291      | -0.406      | 0.121       | 0.463       | 0.328       | 0.364       | 0.266       | 0.051       | 0.214       |
| hsa-miR-200c-3p  | 0.276       | 0.183       | 0.308       | 0.095       | 0.233       | -0.107      | -0.218      | -0.043      | -0.438      | 0.483       | 0.464       | 0.024       |
| hsa-miR-20a-3p   | -0.296      | -0.243      | -0.072      | -0.318      | -0.374      | -0.037      | 0.287       | 0.169       | 0.220       | 0.348       | 0.142       | 0.216       |
| hsa-miR-20a-5p   | -0.084      | 0.006       | -0.126      | -0.325      | -0.397      | 0.096       | 0.489       | 0.373       | 0.345       | 0.419       | 0.169       | 0.240       |
| hsa-miR-20b-5p   | -0.282      | -0.240      | -0.038      | -0.478      | -0.646      | 0.152       | 0.514       | 0.467       | 0.164       | 0.391       | 0.245       | 0.126       |
| hsa-miR-21-5p    | 0.043       | 0.079       | 0.023       | -0.049      | -0.128      | 0.057       | 0.207       | 0.022       | 0.330       | 0.364       | -0.090      | 0.484       |
| hsa-miR-22-3p    | -0.037      | 0.041       | -0.178      | 0.154       | 0.394       | -0.291      | 0.046       | 0.019       | 0.139       | 0.179       | 0.291       | -0.147      |
| hsa-miR-221-3p   | -0.265      | -0.298      | 0.023       | 0.016       | 0.312       | -0.498      | 0.139       | 0.354       | -0.515      | 0.304       | 0.553       | -0.330      |
| hsa-miR-222-3p   | -0.434      | -0.369      | -0.128      | -0.689      | -0.793      | -0.058      | 0.118       | 0.132       | -0.131      | 0.452       | 0.310       | 0.141       |
| hsa-miR-223-3p   | -0.281      | -0.164      | -0.271      | -0.496      | -0.448      | -0.246      | 0.627       | 0.524       | 0.238       | 0.315       | 0.227       | 0.064       |
| hsa-miR-223-5p   | 0.093       | -0.127      | 0.470       | -0.154      | -0.336      | 0.318       | 0.335       | 0.308       | -0.001      | 0.298       | 0.247       | 0.043       |

|                 |        |        |        |        |        |        |        |        |        |        |        |        |
|-----------------|--------|--------|--------|--------|--------|--------|--------|--------|--------|--------|--------|--------|
| hsa-miR-23a-3p  | -0.166 | -0.262 | 0.243  | 0.006  | 0.118  | -0.183 | 0.175  | 0.229  | -0.076 | 0.418  | 0.360  | 0.018  |
| hsa-miR-23b-3p  | -0.387 | -0.387 | -0.046 | -0.148 | 0.116  | -0.501 | 0.007  | 0.175  | -0.262 | 0.236  | 0.390  | -0.210 |
| hsa-miR-24-3p   | 0.199  | 0.272  | -0.094 | 0.190  | 0.406  | -0.306 | 0.408  | 0.306  | 0.314  | 0.371  | 0.222  | 0.098  |
| hsa-miR-25-3p   | 0.013  | 0.096  | -0.046 | -0.534 | -0.556 | 0.005  | 0.398  | 0.367  | 0.126  | 0.360  | 0.148  | 0.202  |
| hsa-miR-26a-5p  | -0.358 | -0.263 | -0.168 | -0.571 | -0.538 | -0.257 | 0.245  | 0.301  | -0.095 | 0.420  | 0.354  | 0.043  |
| hsa-miR-26b-5p  | -0.102 | -0.083 | 0.099  | -0.293 | -0.646 | 0.526  | 0.594  | 0.420  | 0.523  | 0.513  | 0.156  | 0.357  |
| hsa-miR-27a-3p  | -0.062 | 0.090  | -0.304 | 0.146  | 0.273  | -0.263 | 0.334  | 0.141  | 0.405  | 0.464  | 0.207  | 0.231  |
| hsa-miR-27b-3p  | -0.389 | -0.280 | -0.266 | -0.188 | 0.015  | -0.445 | 0.257  | 0.250  | 0.107  | 0.284  | 0.324  | -0.096 |
| hsa-miR-28-5p   | -0.004 | 0.097  | -0.064 | 0.107  | 0.080  | -0.029 | 0.326  | 0.153  | 0.442  | 0.446  | -0.021 | 0.492  |
| hsa-miR-2861    | -0.351 | -0.287 | -0.118 | -0.206 | -0.411 | 0.212  | 0.099  | 0.040  | 0.081  | -0.148 | 0.016  | -0.158 |
| hsa-miR-29a-3p  | 0.009  | 0.172  | -0.252 | -0.117 | -0.335 | 0.313  | 0.508  | 0.322  | 0.581  | 0.289  | -0.259 | 0.577  |
| hsa-miR-29b-3p  | -0.134 | -0.029 | -0.159 | -0.299 | -0.551 | 0.322  | 0.476  | 0.228  | 0.600  | 0.307  | -0.175 | 0.496  |
| hsa-miR-29c-3p  | -0.214 | -0.072 | -0.243 | -0.350 | -0.588 | 0.281  | 0.531  | 0.306  | 0.590  | 0.285  | -0.153 | 0.444  |
| hsa-miR-301a-5p | -0.090 | 0.013  | -0.206 | -0.017 | 0.016  | -0.093 | 0.331  | 0.201  | 0.252  | 0.370  | 0.266  | 0.098  |
| hsa-miR-30b-5p  | -0.385 | -0.307 | -0.134 | -0.538 | -0.661 | 0.024  | 0.397  | 0.296  | 0.146  | 0.401  | 0.215  | 0.171  |
| hsa-miR-30c-5p  | -0.525 | -0.486 | -0.079 | -0.563 | -0.638 | -0.072 | 0.322  | 0.327  | -0.168 | 0.473  | 0.406  | 0.061  |
| hsa-miR-30d-5p  | -0.034 | -0.058 | 0.077  | 0.405  | 0.682  | -0.294 | -0.316 | -0.153 | -0.440 | 0.271  | 0.406  | -0.167 |
| hsa-miR-30e-3p  | -0.242 | -0.148 | -0.138 | -0.142 | -0.189 | -0.016 | 0.188  | 0.044  | 0.202  | 0.468  | 0.043  | 0.439  |
| hsa-miR-30e-5p  | -0.238 | -0.122 | -0.212 | -0.525 | -0.651 | 0.063  | 0.504  | 0.355  | 0.318  | 0.356  | 0.125  | 0.232  |
| hsa-miR-3162-5p | 0.458  | 0.511  | -0.075 | 0.104  | 0.098  | 0.038  | -0.047 | -0.051 | 0.035  | -0.158 | -0.348 | 0.241  |
| hsa-miR-3195    | 0.515  | 0.535  | -0.007 | 0.396  | 0.429  | 0.062  | -0.214 | -0.116 | -0.135 | -0.522 | -0.618 | 0.185  |
| hsa-miR-3196    | -0.231 | -0.203 | 0.011  | -0.515 | -0.654 | 0.059  | -0.149 | -0.114 | -0.184 | 0.057  | 0.021  | 0.096  |
| hsa-miR-3198    | 0.613  | 0.681  | -0.073 | 0.453  | 0.508  | -0.029 | 0.056  | 0.096  | -0.015 | -0.511 | -0.713 | 0.251  |
| hsa-miR-320a    | 0.307  | 0.253  | 0.173  | 0.155  | 0.537  | -0.617 | -0.326 | -0.072 | -0.577 | 0.148  | 0.398  | -0.318 |
| hsa-miR-320b    | 0.384  | 0.324  | 0.203  | 0.135  | 0.486  | -0.560 | -0.275 | -0.002 | -0.523 | 0.079  | 0.385  | -0.377 |
| hsa-miR-320c    | 0.423  | 0.355  | 0.223  | 0.191  | 0.496  | -0.460 | -0.223 | 0.038  | -0.472 | -0.006 | 0.253  | -0.306 |
| hsa-miR-320d    | 0.451  | 0.355  | 0.290  | 0.180  | 0.521  | -0.514 | -0.264 | 0.005  | -0.494 | -0.028 | 0.265  | -0.347 |
| hsa-miR-320e    | 0.424  | 0.321  | 0.307  | 0.138  | 0.467  | -0.490 | -0.267 | 0.013  | -0.527 | 0.040  | 0.290  | -0.299 |
| hsa-miR-324-3p  | -0.474 | -0.464 | -0.043 | -0.682 | -0.788 | -0.091 | 0.284  | 0.491  | -0.455 | 0.461  | 0.573  | -0.159 |
| hsa-miR-324-5p  | 0.135  | 0.113  | -0.030 | 0.353  | 0.643  | -0.357 | -0.033 | 0.075  | -0.184 | 0.325  | 0.417  | -0.170 |
| hsa-miR-326     | -0.369 | -0.343 | -0.141 | 0.105  | 0.328  | -0.367 | 0.114  | 0.205  | -0.145 | 0.214  | 0.486  | -0.362 |
| hsa-miR-331-3p  | -0.132 | -0.214 | 0.124  | 0.402  | 0.672  | -0.312 | -0.084 | 0.047  | -0.173 | 0.397  | 0.426  | -0.070 |
| hsa-miR-335-5p  | -0.326 | -0.253 | -0.157 | -0.243 | -0.127 | -0.235 | 0.592  | 0.584  | 0.156  | 0.412  | 0.430  | -0.058 |
| hsa-miR-338-3p  | -0.486 | -0.378 | -0.339 | -0.334 | -0.355 | -0.021 | 0.283  | 0.172  | 0.164  | 0.364  | 0.176  | 0.167  |
| hsa-miR-340-3p  | -0.189 | -0.199 | 0.075  | -0.206 | -0.255 | 0.025  | 0.420  | 0.347  | 0.119  | 0.469  | 0.321  | 0.131  |
| hsa-miR-340-5p  | -0.105 | -0.021 | -0.206 | -0.406 | -0.564 | 0.187  | 0.579  | 0.360  | 0.513  | 0.382  | 0.241  | 0.101  |
| hsa-miR-342-3p  | 0.284  | 0.401  | 0.046  | -0.167 | -0.309 | 0.168  | 0.064  | 0.127  | -0.013 | 0.426  | 0.011  | 0.448  |
| hsa-miR-342-5p  | 0.619  | 0.490  | 0.543  | 0.129  | 0.018  | 0.233  | -0.006 | 0.035  | 0.066  | 0.112  | -0.325 | 0.497  |
| hsa-miR-361-3p  | 0.200  | 0.406  | -0.211 | -0.418 | -0.554 | 0.124  | 0.094  | 0.071  | 0.152  | 0.275  | -0.026 | 0.306  |
| hsa-miR-361-5p  | 0.392  | 0.491  | 0.013  | -0.109 | 0.195  | -0.512 | -0.467 | -0.255 | -0.525 | 0.321  | 0.291  | -0.007 |
| hsa-miR-362-5p  | 0.290  | 0.422  | -0.228 | -0.313 | -0.177 | -0.331 | -0.180 | -0.233 | -0.093 | 0.220  | -0.032 | 0.267  |
| hsa-miR-363-3p  | -0.405 | -0.310 | -0.198 | -0.317 | -0.528 | 0.328  | 0.072  | 0.175  | -0.159 | 0.115  | 0.106  | -0.027 |
| hsa-miR-3651    | 0.718  | 0.683  | 0.239  | 0.125  | 0.025  | 0.206  | -0.063 | 0.104  | -0.315 | 0.217  | -0.087 | 0.295  |
| hsa-miR-3653-3p | 0.607  | 0.579  | 0.312  | 0.123  | 0.214  | -0.151 | -0.496 | -0.366 | -0.366 | 0.113  | -0.331 | 0.493  |
| hsa-miR-3656    | 0.362  | 0.421  | -0.080 | 0.458  | 0.454  | 0.190  | -0.166 | -0.117 | -0.143 | -0.370 | -0.223 | -0.114 |
| hsa-miR-3665    | 0.178  | 0.204  | 0.000  | 0.005  | -0.250 | 0.427  | 0.077  | 0.050  | 0.100  | 0.132  | 0.135  | 0.016  |
| hsa-miR-374a-5p | -0.162 | -0.009 | -0.306 | -0.446 | -0.518 | -0.022 | 0.704  | 0.545  | 0.475  | 0.427  | 0.223  | 0.186  |
| hsa-miR-374b-5p | -0.346 | -0.236 | -0.260 | -0.678 | -0.549 | -0.318 | 0.622  | 0.582  | 0.242  | 0.329  | 0.302  | -0.009 |
| hsa-miR-376a-3p | -0.023 | 0.074  | -0.093 | 0.296  | 0.272  | 0.066  | 0.063  | -0.006 | 0.253  | 0.004  | 0.104  | -0.171 |
| hsa-miR-376c-3p | 0.106  | 0.188  | -0.040 | 0.335  | 0.328  | 0.049  | 0.056  | -0.004 | 0.256  | -0.008 | 0.008  | -0.071 |
| hsa-miR-378a-3p | 0.634  | 0.564  | 0.303  | -0.013 | -0.093 | 0.190  | -0.379 | -0.364 | -0.291 | -0.060 | -0.255 | 0.203  |
| hsa-miR-378d    | 0.234  | 0.116  | 0.377  | -0.124 | -0.333 | 0.379  | -0.175 | -0.177 | -0.204 | 0.030  | -0.180 | 0.219  |
| hsa-miR-378i    | 0.594  | 0.493  | 0.384  | -0.078 | -0.192 | 0.227  | -0.342 | -0.314 | -0.310 | -0.047 | -0.221 | 0.181  |
| hsa-miR-3960    | -0.383 | -0.414 | 0.073  | -0.338 | -0.395 | -0.076 | 0.068  | 0.100  | -0.246 | 0.189  | 0.248  | -0.045 |
| hsa-miR-423-3p  | 0.135  | 0.297  | -0.331 | 0.394  | 0.684  | -0.421 | -0.343 | -0.211 | -0.347 | 0.112  | 0.416  | -0.313 |
| hsa-miR-423-5p  | 0.626  | 0.501  | 0.388  | 0.229  | 0.488  | -0.326 | -0.305 | 0.016  | -0.655 | 0.254  | 0.258  | -0.065 |
| hsa-miR-424-5p  | -0.460 | -0.424 | -0.117 | -0.307 | -0.492 | 0.199  | 0.368  | 0.254  | 0.286  | 0.051  | -0.166 | 0.221  |
| hsa-miR-425-5p  | -0.185 | -0.176 | -0.069 | -0.462 | -0.358 | -0.209 | 0.422  | 0.431  | -0.026 | 0.380  | 0.333  | 0.002  |
| hsa-miR-4281    | 0.042  | 0.016  | 0.138  | 0.105  | -0.198 | 0.496  | -0.104 | -0.145 | 0.008  | -0.210 | -0.039 | -0.148 |
| hsa-miR-4284    | 0.831  | 0.696  | 0.472  | -0.016 | -0.177 | 0.365  | 0.077  | 0.183  | -0.128 | 0.342  | 0.011  | 0.333  |
| hsa-miR-4286    | 0.366  | 0.252  | 0.323  | -0.595 | -0.672 | -0.007 | -0.029 | 0.068  | -0.229 | 0.183  | 0.043  | 0.142  |
| hsa-miR-4291    | -0.171 | -0.069 | -0.246 | -0.206 | -0.032 | -0.387 | 0.121  | 0.118  | -0.114 | 0.381  | 0.336  | -0.035 |
| hsa-miR-4299    | -0.097 | 0.035  | -0.309 | 0.271  | 0.074  | 0.269  | 0.116  | 0.212  | -0.188 | -0.341 | -0.198 | -0.063 |
| hsa-miR-4306    | 0.248  | 0.218  | 0.089  | 0.486  | 0.706  | -0.163 | 0.328  | 0.257  | 0.268  | 0.199  | 0.080  | 0.075  |
| hsa-miR-4323    | 0.268  | 0.320  | 0.088  | -0.175 | 0.079  | -0.497 | -0.558 | -0.291 | -0.712 | -0.069 | -0.056 | 0.013  |
| hsa-miR-4442    | 0.569  | 0.614  | -0.001 | 0.304  | 0.282  | 0.048  | -0.054 | -0.062 | -0.006 | -0.412 | -0.380 | 0.016  |
| hsa-miR-4443    | 0.423  | 0.455  | -0.032 | 0.423  | 0.475  | 0.014  | -0.430 | -0.500 | 0.166  | -0.468 | -0.461 | 0.090  |
| hsa-miR-4459    | 0.225  | 0.300  | -0.164 | 0.479  | 0.619  | -0.138 | -0.281 | -0.271 | -0.130 | -0.506 | -0.367 | -0.083 |
| hsa-miR-4466    | -0.213 | -0.110 | -0.227 | 0.070  | -0.203 | 0.385  | 0.122  | 0.015  | 0.189  | -0.069 | 0.003  | -0.057 |

|                  |        |        |        |        |        |        |        |        |        |        |        |        |
|------------------|--------|--------|--------|--------|--------|--------|--------|--------|--------|--------|--------|--------|
| hsa-miR-4485-3p  | 0.040  | 0.186  | -0.364 | 0.528  | 0.771  | -0.309 | -0.386 | -0.411 | -0.074 | -0.631 | -0.325 | -0.278 |
| hsa-miR-4485-5p  | 0.475  | 0.467  | 0.064  | 0.578  | 0.840  | -0.335 | -0.534 | -0.499 | -0.193 | -0.709 | -0.337 | -0.363 |
| hsa-miR-4505     | -0.052 | 0.126  | -0.411 | 0.293  | 0.225  | 0.106  | -0.137 | -0.186 | 0.052  | -0.430 | -0.301 | -0.123 |
| hsa-miR-4507     | 0.266  | 0.391  | -0.260 | 0.470  | 0.477  | 0.083  | -0.250 | -0.294 | 0.092  | -0.463 | -0.350 | -0.087 |
| hsa-miR-4516     | -0.458 | -0.435 | -0.088 | -0.439 | -0.322 | -0.376 | 0.046  | -0.002 | -0.057 | -0.049 | -0.095 | 0.050  |
| hsa-miR-451a     | -0.721 | -0.610 | -0.403 | -0.254 | -0.367 | 0.025  | 0.339  | 0.463  | -0.146 | 0.241  | 0.300  | -0.034 |
| hsa-miR-4530     | 0.282  | 0.407  | -0.259 | 0.562  | 0.541  | 0.149  | -0.128 | -0.177 | 0.086  | -0.517 | -0.449 | -0.066 |
| hsa-miR-454-3p   | -0.236 | -0.267 | 0.113  | -0.252 | -0.381 | 0.161  | 0.437  | 0.316  | 0.273  | 0.494  | 0.145  | 0.372  |
| hsa-miR-4665-3p  | 0.416  | 0.446  | 0.042  | 0.652  | 0.524  | 0.416  | -0.489 | -0.320 | -0.321 | -0.140 | -0.102 | 0.038  |
| hsa-miR-4687-3p  | 0.194  | 0.236  | -0.017 | 0.254  | 0.087  | 0.263  | 0.072  | -0.007 | 0.126  | -0.217 | -0.103 | -0.096 |
| hsa-miR-4713-3p  | 0.634  | 0.684  | -0.033 | 0.521  | 0.560  | 0.064  | -0.118 | -0.052 | -0.021 | -0.480 | -0.739 | 0.339  |
| hsa-miR-4739     | -0.037 | -0.051 | 0.035  | -0.173 | -0.428 | 0.328  | 0.333  | 0.289  | 0.139  | 0.386  | 0.389  | -0.008 |
| hsa-miR-484      | -0.137 | -0.198 | 0.097  | 0.244  | 0.489  | -0.438 | -0.055 | 0.080  | -0.318 | 0.265  | 0.358  | -0.129 |
| hsa-miR-486-5p   | -0.627 | -0.550 | -0.314 | -0.139 | 0.105  | -0.527 | -0.040 | 0.227  | -0.522 | 0.138  | 0.529  | -0.418 |
| hsa-miR-487b-3p  | 0.033  | 0.049  | 0.045  | 0.316  | 0.320  | 0.032  | 0.088  | 0.102  | 0.097  | 0.088  | 0.204  | -0.195 |
| hsa-miR-494-3p   | -0.043 | 0.114  | -0.390 | 0.382  | 0.597  | -0.254 | -0.358 | -0.331 | -0.209 | -0.563 | -0.358 | -0.157 |
| hsa-miR-5100     | -0.222 | -0.246 | 0.155  | -0.597 | -0.758 | 0.078  | -0.003 | 0.131  | -0.333 | 0.444  | 0.335  | 0.122  |
| hsa-miR-532-5p   | 0.395  | 0.441  | -0.025 | -0.569 | -0.600 | -0.052 | 0.206  | 0.139  | 0.057  | 0.201  | 0.021  | 0.156  |
| hsa-miR-5739     | -0.038 | -0.020 | -0.017 | -0.516 | -0.652 | 0.051  | -0.060 | -0.130 | 0.103  | 0.067  | -0.081 | 0.119  |
| hsa-miR-574-5p   | 0.213  | -0.095 | 0.711  | -0.381 | -0.152 | -0.470 | -0.200 | -0.293 | 0.041  | -0.500 | -0.144 | -0.429 |
| hsa-miR-584-5p   | -0.270 | -0.406 | 0.206  | 0.087  | 0.193  | -0.061 | -0.159 | 0.085  | -0.569 | 0.018  | 0.522  | -0.613 |
| hsa-miR-590-5p   | 0.005  | 0.121  | -0.169 | -0.024 | -0.149 | 0.184  | 0.518  | 0.282  | 0.591  | 0.447  | 0.058  | 0.405  |
| hsa-miR-6085     | -0.570 | -0.579 | -0.013 | -0.628 | -0.762 | 0.007  | 0.511  | 0.620  | -0.242 | 0.527  | 0.401  | 0.125  |
| hsa-miR-6087     | 0.110  | 0.248  | -0.329 | 0.624  | 0.610  | 0.134  | -0.228 | -0.287 | 0.035  | -0.522 | -0.380 | -0.086 |
| hsa-miR-6088     | 0.179  | 0.206  | -0.008 | 0.460  | 0.199  | 0.551  | -0.152 | -0.231 | 0.123  | -0.373 | -0.224 | -0.137 |
| hsa-miR-6089     | 0.039  | 0.105  | -0.067 | 0.137  | -0.081 | 0.359  | -0.080 | -0.193 | 0.162  | -0.163 | -0.077 | -0.089 |
| hsa-miR-6090     | -0.061 | -0.025 | -0.037 | -0.003 | -0.245 | 0.338  | 0.038  | -0.026 | 0.043  | 0.038  | 0.067  | -0.054 |
| hsa-miR-6125     | -0.530 | -0.488 | -0.164 | -0.345 | -0.570 | 0.257  | -0.044 | -0.082 | -0.013 | -0.213 | -0.052 | -0.127 |
| hsa-miR-6126     | -0.139 | 0.082  | -0.499 | -0.147 | -0.292 | 0.142  | 0.030  | 0.094  | -0.127 | -0.252 | -0.052 | -0.184 |
| hsa-miR-6127     | 0.687  | 0.671  | 0.161  | 0.392  | 0.299  | 0.242  | -0.313 | -0.196 | -0.106 | 0.028  | -0.220 | 0.338  |
| hsa-miR-6131     | 0.702  | 0.697  | 0.105  | 0.534  | 0.519  | 0.181  | -0.085 | -0.014 | -0.017 | -0.348 | -0.728 | 0.455  |
| hsa-miR-6165     | 0.545  | 0.571  | -0.009 | 0.160  | 0.218  | -0.042 | -0.069 | -0.069 | 0.082  | 0.067  | -0.278 | 0.354  |
| hsa-miR-625-5p   | 0.233  | 0.088  | 0.447  | 0.364  | 0.401  | 0.084  | -0.157 | -0.161 | 0.115  | 0.378  | 0.212  | 0.178  |
| hsa-miR-638      | 0.557  | 0.596  | -0.006 | 0.640  | 0.646  | 0.150  | -0.094 | -0.147 | 0.186  | -0.247 | -0.238 | 0.024  |
| hsa-miR-652-3p   | -0.255 | -0.264 | -0.045 | 0.143  | 0.445  | -0.439 | -0.116 | 0.081  | -0.422 | 0.318  | 0.504  | -0.265 |
| hsa-miR-660-5p   | -0.001 | 0.076  | -0.090 | -0.422 | -0.611 | 0.197  | 0.453  | 0.260  | 0.428  | 0.203  | -0.091 | 0.308  |
| hsa-miR-664b-3p  | -0.096 | -0.076 | 0.151  | -0.222 | -0.340 | 0.089  | -0.387 | -0.224 | -0.396 | 0.170  | -0.135 | 0.360  |
| hsa-miR-6717-5p  | 0.671  | 0.714  | 0.000  | 0.580  | 0.608  | 0.099  | -0.048 | 0.030  | -0.020 | -0.358 | -0.720 | 0.442  |
| hsa-miR-6740-5p  | 0.626  | 0.672  | -0.024 | 0.574  | 0.608  | 0.080  | -0.125 | -0.118 | 0.046  | -0.551 | -0.784 | 0.284  |
| hsa-miR-6749-5p  | -0.246 | -0.240 | -0.009 | -0.510 | -0.677 | 0.077  | 0.018  | -0.077 | 0.162  | -0.013 | -0.091 | 0.053  |
| hsa-miR-6763-5p  | 0.545  | 0.569  | -0.003 | 0.210  | 0.212  | 0.084  | -0.036 | -0.055 | 0.118  | -0.056 | -0.308 | 0.288  |
| hsa-miR-6780b-5p | 0.534  | 0.571  | -0.022 | 0.590  | 0.625  | 0.118  | -0.170 | -0.128 | -0.011 | -0.602 | -0.759 | 0.218  |
| hsa-miR-6800-5p  | -0.467 | -0.455 | -0.019 | -0.337 | -0.605 | 0.328  | -0.026 | -0.086 | 0.033  | 0.034  | 0.130  | -0.095 |
| hsa-miR-6803-5p  | -0.130 | 0.042  | -0.420 | 0.305  | 0.257  | 0.050  | -0.065 | -0.010 | -0.163 | -0.323 | -0.109 | -0.146 |
| hsa-miR-6821-5p  | -0.475 | -0.424 | -0.106 | -0.245 | -0.504 | 0.304  | 0.134  | 0.001  | 0.158  | -0.064 | -0.032 | -0.092 |
| hsa-miR-6826-5p  | 0.710  | 0.720  | 0.069  | 0.446  | 0.489  | 0.084  | -0.439 | -0.407 | 0.009  | -0.024 | -0.490 | 0.477  |
| hsa-miR-6869-5p  | -0.014 | 0.045  | -0.086 | 0.564  | 0.608  | 0.014  | -0.150 | -0.322 | 0.271  | -0.334 | -0.173 | -0.174 |
| hsa-miR-6875-5p  | 0.663  | 0.663  | 0.090  | 0.591  | 0.566  | 0.219  | -0.251 | -0.150 | -0.104 | -0.487 | -0.662 | 0.260  |
| hsa-miR-6879-5p  | 0.644  | 0.639  | 0.106  | 0.432  | 0.409  | 0.152  | -0.109 | -0.052 | -0.062 | -0.489 | -0.719 | 0.305  |
| hsa-miR-7114-5p  | -0.133 | -0.176 | 0.081  | -0.514 | -0.669 | 0.088  | 0.119  | 0.204  | -0.193 | 0.531  | 0.331  | 0.205  |
| hsa-miR-7641     | -0.139 | -0.025 | -0.291 | 0.164  | 0.124  | 0.101  | -0.314 | -0.218 | -0.253 | -0.474 | -0.309 | -0.096 |
| hsa-miR-766-3p   | 0.117  | 0.145  | 0.038  | 0.167  | 0.472  | -0.455 | -0.530 | -0.299 | -0.509 | -0.028 | 0.169  | -0.217 |
| hsa-miR-7704     | 0.218  | 0.233  | 0.020  | 0.247  | 0.082  | 0.383  | -0.184 | -0.250 | 0.087  | -0.268 | -0.208 | -0.026 |
| hsa-miR-7975     | 0.541  | 0.557  | 0.178  | -0.138 | -0.298 | 0.127  | -0.381 | -0.139 | -0.602 | 0.426  | 0.139  | 0.311  |
| hsa-miR-7977     | -0.147 | -0.164 | 0.096  | -0.557 | -0.716 | 0.079  | -0.077 | 0.081  | -0.368 | 0.467  | 0.302  | 0.164  |
| hsa-miR-8069     | 0.053  | 0.080  | 0.093  | -0.069 | -0.443 | 0.534  | -0.263 | -0.258 | -0.136 | -0.002 | -0.085 | 0.112  |
| hsa-miR-874-3p   | -0.446 | -0.402 | -0.059 | -0.621 | -0.860 | 0.222  | -0.020 | 0.079  | -0.422 | 0.154  | 0.373  | -0.235 |
| hsa-miR-92a-3p   | -0.098 | -0.107 | 0.125  | -0.296 | -0.055 | -0.508 | -0.201 | 0.050  | -0.500 | 0.302  | 0.373  | -0.115 |
| hsa-miR-93-5p    | 0.021  | 0.034  | -0.057 | -0.260 | -0.102 | -0.243 | 0.280  | 0.424  | -0.240 | 0.365  | 0.360  | -0.047 |
| hsa-miR-939-5p   | 0.474  | 0.479  | 0.024  | 0.114  | 0.006  | 0.225  | 0.030  | 0.070  | 0.000  | 0.113  | -0.158 | 0.310  |
| hsa-miR-940      | -0.085 | -0.050 | -0.007 | 0.139  | -0.151 | 0.487  | -0.221 | -0.040 | -0.470 | -0.158 | -0.076 | -0.036 |
| hsa-miR-98-5p    | 0.000  | -0.083 | 0.296  | 0.215  | 0.134  | 0.249  | 0.442  | 0.401  | 0.213  | 0.443  | 0.274  | 0.128  |

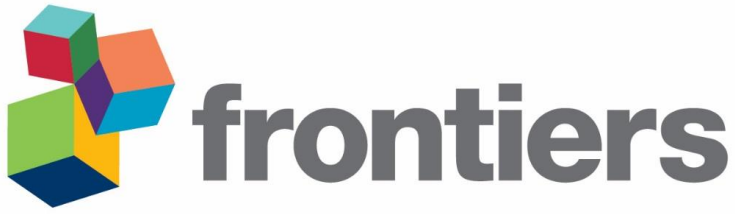

Supplement: DataSheet_2.pdf [file DataSheet_2.pdf]
